# Supplementary material
Source: MDPI journal article supplement (https://www.mdpi.com/2504-2289/4/4/32)
Supplement: s1 [file s1]

meas	app	elapsed	matrix size	processors	time
elapsed	MLlib (op)	7288940582	1024	16	1591214968
elapsed	MLlib (op)	8090203671	2048	16	1591214982
elapsed	MLlib (op)	21573128895	4096	16	1591215011
elapsed	MLlib (op)	104629063004	8192	16	1591215122
elapsed	MLlib (op)	189199402267	10240	16	1591215318
elapsed	MLlib (op)	564243498046	15360	16	1591215888
elapsed	MLlib (op)	7081247597	1024	16	1591215902
elapsed	MLlib (op)	8226089642	2048	16	1591215917
elapsed	MLlib (op)	21750196640	4096	16	1591215946
elapsed	MLlib (op)	103337543813	8192	16	1591216056
elapsed	MLlib (op)	191357718312	10240	16	1591216253
elapsed	MLlib (op)	568105049046	15360	16	1591216828
elapsed	MLlib (op)	6646580903	1024	16	1591216842
elapsed	MLlib (op)	8763994979	2048	16	1591216857
elapsed	MLlib (op)	21679933739	4096	16	1591216885
elapsed	MLlib (op)	102224545529	8192	16	1591216994
elapsed	MLlib (op)	189176991928	10240	16	1591217190
elapsed	MLlib (op)	564891469612	15360	16	1591217762
elapsed	MLlib (op)	6590647877	1024	16	1591217775
elapsed	MLlib (op)	8043326046	2048	16	1591217790
elapsed	MLlib (op)	21701860518	4096	16	1591217818
elapsed	MLlib (op)	103244094670	8192	16	1591217928
elapsed	MLlib (op)	190233627077	10240	16	1591218125
elapsed	MLlib (op)	575733610280	15360	16	1591218707
elapsed	MLlib (op)	7227250097	1024	16	1591218721
elapsed	MLlib (op)	8236756205	2048	16	1591218736
elapsed	MLlib (op)	21838615154	4096	16	1591218765
elapsed	MLlib (op)	103265232101	8192	16	1591218875
elapsed	MLlib (op)	190638662807	10240	16	1591219072
elapsed	MLlib (op)	568130523071	15360	16	1591219647
elapsed	MLlib (op)	7228674342	1024	16	1591219661
elapsed	MLlib (op)	9191419644	2048	16	1591219676
elapsed	MLlib (op)	21922132779	4096	16	1591219705
elapsed	MLlib (op)	101972404713	8192	16	1591219814
elapsed	MLlib (op)	189433068981	10240	16	1591220010
elapsed	MLlib (op)	565888658085	15360	16	1591220582
elapsed	MLlib (op)	7210842226	1024	16	1591220596
elapsed	MLlib (op)	8168389644	2048	16	1591220611
elapsed	MLlib (op)	21310669199	4096	16	1591220639
elapsed	MLlib (op)	103343630422	8192	16	1591220749
elapsed	MLlib (op)	189584924006	10240	16	1591220945
elapsed	MLlib (op)	555827939669	15360	16	1591221508
elapsed	MLlib (op)	6787762519	1024	16	1591221521
elapsed	MLlib (op)	9308357411	2048	16	1591221537
elapsed	MLlib (op)	23333340295	4096	16	1591221567
elapsed	MLlib (op)	105007204817	8192	16	1591221679
elapsed	MLlib (op)	190654315174	10240	16	1591221876
elapsed	MLlib (op)	566279716292	15360	16	1591222449
elapsed	MLlib (op)	6767966537	1024	16	1591222463
elapsed	MLlib (op)	8679662540	2048	16	1591222478
elapsed	MLlib (op)	22083615413	4096	16	1591222507
elapsed	MLlib (op)	103233203027	8192	16	1591222617
elapsed	MLlib (op)	188730828117	10240	16	1591222812
elapsed	MLlib (op)	571095456146	15360	16	1591223390
elapsed	MLlib (op)	6629783083	1024	16	1591223403
elapsed	MLlib (op)	8150684875	2048	16	1591223418
elapsed	MLlib (op)	21452322348	4096	16	1591223446
elapsed	MLlib (op)	102301711996	8192	16	1591223555
elapsed	MLlib (op)	190048702780	10240	16	1591223751
elapsed	MLlib (op)	562346818976	15360	16	1591224320
elapsed	mpi	125931024.551392	1024	16	1591224322
elapsed	mpi	907796144.485474	2048	16	1591224324
elapsed	mpi	6869510889.053345	4096	16	1591224335
elapsed	mpi	74322149276.733398	8192	16	1591224426
elapsed	mpi	152968344688.415527	10240	16	1591224606
elapsed	mpi	395115360021.591187	15360	16	1591225064
elapsed	mpi	125370264.053345	1024	16	1591225066
elapsed	mpi	1129246950.149536	2048	16	1591225068
elapsed	mpi	6860859155.654907	4096	16	1591225079
elapsed	mpi	74613303899.765015	8192	16	1591225166
elapsed	mpi	153324851274.490356	10240	16	1591225340
elapsed	mpi	395206650972.366333	15360	16	1591225781
elapsed	mpi	128819704.055786	1024	16	1591225783
elapsed	mpi	906583786.010742	2048	16	1591225785
elapsed	mpi	6866677761.077881	4096	16	1591225795
elapsed	mpi	74918498992.919922	8192	16	1591225880
elapsed	mpi	153140171289.443970	10240	16	1591226054
elapsed	mpi	396244816303.253174	15360	16	1591226494
elapsed	mpi	126352310.180664	1024	16	1591226497
elapsed	mpi	907372236.251831	2048	16	1591226499
elapsed	mpi	6856210947.036743	4096	16	1591226509
elapsed	mpi	73597167730.331421	8192	16	1591226594
elapsed	mpi	153373005628.585815	10240	16	1591226768
elapsed	mpi	394249397277.832031	15360	16	1591227205
elapsed	mpi	130140066.146851	1024	16	1591227208
elapsed	mpi	898768186.569214	2048	16	1591227210
elapsed	mpi	6991786003.112793	4096	16	1591227220
elapsed	mpi	73882061719.894409	8192	16	1591227305
elapsed	mpi	153704732894.897461	10240	16	1591227477
elapsed	mpi	394291310548.782349	15360	16	1591227911
elapsed	mpi	125387907.028198	1024	16	1591227914
elapsed	mpi	1122872591.018677	2048	16	1591227916
elapsed	mpi	6855059385.299683	4096	16	1591227926
elapsed	mpi	74531424999.237061	8192	16	1591228013
elapsed	mpi	153573479175.567627	10240	16	1591228186
elapsed	mpi	394953812599.182129	15360	16	1591228624
elapsed	mpi	127673625.946045	1024	16	1591228627
elapsed	mpi	901776313.781738	2048	16	1591228629
elapsed	mpi	6852113723.754883	4096	16	1591228639
elapsed	mpi	74365483283.996582	8192	16	1591228726
elapsed	mpi	152850922346.115112	10240	16	1591228902
elapsed	mpi	393689347028.732300	15360	16	1591229336
elapsed	mpi	125645399.093628	1024	16	1591229339
elapsed	mpi	901236534.118652	2048	16	1591229341
elapsed	mpi	6868580341.339111	4096	16	1591229351
elapsed	mpi	73938296794.891357	8192	16	1591229437
elapsed	mpi	153352499485.015869	10240	16	1591229609
elapsed	mpi	394990191698.074341	15360	16	1591230043
elapsed	mpi	127372980.117798	1024	16	1591230045
elapsed	mpi	916716337.203979	2048	16	1591230047
elapsed	mpi	6872096776.962280	4096	16	1591230057
elapsed	mpi	74847342252.731323	8192	16	1591230144
elapsed	mpi	153588556289.672852	10240	16	1591230317
elapsed	mpi	395969891786.575317	15360	16	1591230758
elapsed	mpi	126477241.516113	1024	16	1591230760
elapsed	mpi	906212329.864502	2048	16	1591230762
elapsed	mpi	7060830116.271973	4096	16	1591230772
elapsed	mpi	74787174701.690674	8192	16	1591230860
elapsed	mpi	153807262182.235718	10240	16	1591231032
elapsed	mpi	393946410179.138184	15360	16	1591231467
elapsed	MLlib	8200449150	1024	16	1591231482
elapsed	MLlib	8180218759	2048	16	1591231497
elapsed	MLlib	21395890305	4096	16	1591231524
elapsed	MLlib	105900152567	8192	16	1591231637
elapsed	MLlib	226251595202	10240	16	1591231870
elapsed	MLlib	6796991763	1024	16	1591231883
elapsed	MLlib	8027357625	2048	16	1591231898
elapsed	MLlib	21687856463	4096	16	1591231926
elapsed	MLlib	105831356446	8192	16	1591232039
elapsed	MLlib	227875374919	10240	16	1591232273
elapsed	MLlib	6609426296	1024	16	1591232287
elapsed	MLlib	8072140980	2048	16	1591232301
elapsed	MLlib	21891042367	4096	16	1591232329
elapsed	MLlib	106175158514	8192	16	1591232442
elapsed	MLlib	218484130852	10240	16	1591232667
elapsed	MLlib	7141725909	1024	16	1591232681
elapsed	MLlib	8198729658	2048	16	1591232696
elapsed	MLlib	21762893862	4096	16	1591232724
elapsed	MLlib	107051705521	8192	16	1591232838
elapsed	MLlib	228932530807	10240	16	1591233073
elapsed	MLlib	6632375871	1024	16	1591233087
elapsed	MLlib	8132843878	2048	16	1591233101
elapsed	MLlib	21620876837	4096	16	1591233130
elapsed	MLlib	106850451526	8192	16	1591233243
elapsed	MLlib	231143967408	10240	16	1591233481
elapsed	MLlib	6582947683	1024	16	1591233494
elapsed	MLlib	8055351559	2048	16	1591233509
elapsed	MLlib	21533024922	4096	16	1591233537
elapsed	MLlib	111405256709	8192	16	1591233655
elapsed	MLlib	223397206819	10240	16	1591233885
elapsed	MLlib	6688848257	1024	16	1591233898
elapsed	MLlib	7982389126	2048	16	1591233913
elapsed	MLlib	21590667695	4096	16	1591233941
elapsed	MLlib	107292815969	8192	16	1591234055
elapsed	MLlib	227733706477	10240	16	1591234289
elapsed	MLlib	6754018458	1024	16	1591234302
elapsed	MLlib	8140214548	2048	16	1591234317
elapsed	MLlib	21677404484	4096	16	1591234345
elapsed	MLlib	108074492511	8192	16	1591234460
elapsed	MLlib	223784045101	10240	16	1591234690
elapsed	MLlib	6634614698	1024	16	1591234704
elapsed	MLlib	7982591419	2048	16	1591234718
elapsed	MLlib	21796928537	4096	16	1591234746
elapsed	MLlib	107263266709	8192	16	1591234860
elapsed	MLlib	222548824571	10240	16	1591235090
elapsed	MLlib	6493389794	1024	16	1591235103
elapsed	MLlib	8192360196	2048	16	1591235118
elapsed	MLlib	21394617270	4096	16	1591235146
elapsed	MLlib	106868433846	8192	16	1591235259
elapsed	MLlib	215983286948	10240	16	1591235481
elapsed	jampi	17176372530	1024	16	1591246929
elapsed	jampi	17773169604	2048	16	1591246951
elapsed	jampi	79310414251	8192	16	1591247054
elapsed	jampi	139828714211	10240	16	1591247198
elapsed	jampi	406874409127	15360	16	1591247608
elapsed	jampi	17176346483	1024	16	1591247629
elapsed	jampi	17803629745	2048	16	1591247650
elapsed	jampi	23914809132	4096	16	1591247678
elapsed	jampi	79396259371	8192	16	1591247761
elapsed	jampi	137914179363	10240	16	1591247902
elapsed	jampi	408153594631	15360	16	1591248314
elapsed	jampi	17180537226	1024	16	1591248334
elapsed	jampi	17658495263	2048	16	1591248356
elapsed	jampi	23969905360	4096	16	1591248383
elapsed	jampi	78816148833	8192	16	1591248466
elapsed	jampi	139121149885	10240	16	1591248608
elapsed	jampi	408700225699	15360	16	1591249021
elapsed	jampi	17305033923	1024	16	1591249042
elapsed	jampi	17859742005	2048	16	1591249063
elapsed	jampi	24051735262	4096	16	1591249091
elapsed	jampi	78801283300	8192	16	1591249173
elapsed	jampi	137870768313	10240	16	1591249315
elapsed	jampi	409345227517	15360	16	1591249728
elapsed	jampi	17202926104	1024	16	1591249748
elapsed	jampi	17740571060	2048	16	1591249770
elapsed	jampi	24078193262	4096	16	1591249798
elapsed	jampi	78666040119	8192	16	1591249880
elapsed	jampi	137997316056	10240	16	1591250021
elapsed	jampi	409389756894	15360	16	1591250434
elapsed	jampi	17153399637	1024	16	1591250455
elapsed	jampi	17981019544	2048	16	1591250477
elapsed	jampi	24093016587	4096	16	1591250504
elapsed	jampi	79173159998	8192	16	1591250587
elapsed	jampi	138222287563	10240	16	1591250729
elapsed	jampi	408133699724	15360	16	1591251141
elapsed	jampi	17254340694	1024	16	1591251162
elapsed	jampi	17642006395	2048	16	1591251183
elapsed	jampi	24019483185	4096	16	1591251211
elapsed	jampi	79356621010	8192	16	1591251294
elapsed	jampi	138794848586	10240	16	1591251436
elapsed	jampi	409408722389	15360	16	1591251849
elapsed	jampi	17187582937	1024	16	1591251870
elapsed	jampi	17742934368	2048	16	1591251891
elapsed	jampi	24137960737	4096	16	1591251919
elapsed	jampi	78867888388	8192	16	1591252001
elapsed	jampi	137818056355	10240	16	1591252143
elapsed	jampi	408349845300	15360	16	1591252555
elapsed	jampi	17174572546	1024	16	1591252575
elapsed	jampi	17759196041	2048	16	1591252597
elapsed	jampi	23980246711	4096	16	1591252624
elapsed	jampi	78669902303	8192	16	1591252707
elapsed	jampi	139750960246	10240	16	1591252850
elapsed	jampi	410326462631	15360	16	1591253264
elapsed	jampi	17179658025	1024	16	1591253285
elapsed	jampi	17762880515	2048	16	1591253306
elapsed	jampi	23851429432	4096	16	1591253334
elapsed	jampi	78545272361	8192	16	1591253416
elapsed	jampi	138294947079	10240	16	1591253558
elapsed	jampi	408105336406	15360	16	1591253970
elapsed	mpi	249184131.622314	2048	64	1591361150
elapsed	mpi	1755713224.411011	4096	64	1591361159
elapsed	mpi	13465873241.424561	8192	64	1591361200
elapsed	mpi	24981741189.956665	10240	64	1591361268
elapsed	mpi	88800060510.635376	15360	64	1591361452
elapsed	mpi	303981555461.883545	20480	64	1591361927
elapsed	mpi	234516382.217407	2048	64	1591361932
elapsed	mpi	1739730596.542358	4096	64	1591361940
elapsed	mpi	13408280611.038208	8192	64	1591361981
elapsed	mpi	25028697490.692139	10240	64	1591362048
elapsed	mpi	88665855407.714844	15360	64	1591362223
elapsed	mpi	303770080089.569092	20480	64	1591362692
elapsed	mpi	244043588.638306	2048	64	1591362696
elapsed	mpi	1745881557.464600	4096	64	1591362704
elapsed	mpi	13412297487.258911	8192	64	1591362745
elapsed	mpi	25008750200.271606	10240	64	1591362811
elapsed	mpi	88559122323.989868	15360	64	1591362984
elapsed	mpi	303840914249.420166	20480	64	1591363460
elapsed	mpi	237823009.490967	2048	64	1591363464
elapsed	mpi	1757319211.959839	4096	64	1591363473
elapsed	mpi	13454134941.101074	8192	64	1591363516
elapsed	mpi	25039910793.304443	10240	64	1591363585
elapsed	mpi	88772073745.727539	15360	64	1591363767
elapsed	mpi	303562490701.675415	20480	64	1591364208
elapsed	mpi	242966890.335083	2048	64	1591364214
elapsed	mpi	1750831365.585327	4096	64	1591364222
elapsed	mpi	13420737028.121948	8192	64	1591364263
elapsed	mpi	25034799814.224243	10240	64	1591364329
elapsed	mpi	88948299884.796143	15360	64	1591364514
elapsed	mpi	303164692401.885986	20480	64	1591364971
elapsed	mpi	238729476.928711	2048	64	1591364976
elapsed	mpi	1745199441.909790	4096	64	1591364984
elapsed	mpi	13410611629.486084	8192	64	1591365024
elapsed	mpi	24967835664.749146	10240	64	1591365091
elapsed	mpi	88923946619.033813	15360	64	1591365278
elapsed	mpi	303492908239.364624	20480	64	1591365758
elapsed	mpi	230741024.017334	2048	64	1591365763
elapsed	mpi	1753503322.601318	4096	64	1591365771
elapsed	mpi	13469550609.588623	8192	64	1591365813
elapsed	mpi	24987915039.062500	10240	64	1591365880
elapsed	mpi	88818948030.471802	15360	64	1591366062
elapsed	mpi	303219580411.911011	20480	64	1591366544
elapsed	mpi	234974384.307861	2048	64	1591366549
elapsed	mpi	1756703615.188599	4096	64	1591366558
elapsed	mpi	13462994575.500488	8192	64	1591366598
elapsed	mpi	25009646892.547607	10240	64	1591366666
elapsed	mpi	88865944623.947144	15360	64	1591366850
elapsed	mpi	303219580411.911011	20480	64	1591366544
elapsed	mpi	234974384.307861	2048	64	1591366549
elapsed	mpi	1756703615.188599	4096	64	1591366558
elapsed	mpi	13462994575.500488	8192	64	1591366598
elapsed	mpi	25009646892.547607	10240	64	1591366666
elapsed	mpi	88865944623.947144	15360	64	1591366850
elapsed	mpi	305415230035.781860	20480	64	1591367303
elapsed	mpi	236984014.511108	2048	64	1591367307
elapsed	mpi	1743275642.395020	4096	64	1591367316
elapsed	mpi	13450530290.603638	8192	64	1591367357
elapsed	mpi	24965962648.391724	10240	64	1591367423
elapsed	mpi	88983390092.849731	15360	64	1591367604
elapsed	mpi	305168540954.589844	20480	64	1591368071
elapsed	mpi	240493297.576904	2048	64	1591368076
elapsed	mpi	1766118526.458740	4096	64	1591368084
elapsed	mpi	13440711259.841919	8192	64	1591368124
elapsed	mpi	24977894544.601440	10240	64	1591368191
elapsed	mpi	88813325166.702271	15360	64	1591368372
elapsed	mpi	303323054313.659668	20480	64	1591368857
elapsed	jampi	18453170723	4096	64	1591368898
elapsed	jampi	31988511095	8192	64	1591368933
elapsed	jampi	47519381173	10240	64	1591368984
elapsed	jampi	126863565184	15360	64	1591369114
elapsed	jampi	284559818715	20480	64	1591369401
elapsed	jampi	17307348302	2048	64	1591369422
elapsed	jampi	18488909878	4096	64	1591369443
elapsed	jampi	31993073353	8192	64	1591369478
elapsed	jampi	47824821043	10240	64	1591369529
elapsed	jampi	125802885312	15360	64	1591369658
elapsed	jampi	277929374771	20480	64	1591369939
elapsed	jampi	17401669443	2048	64	1591369959
elapsed	jampi	18410346494	4096	64	1591369981
elapsed	jampi	47476904894	10240	64	1591370051
elapsed	jampi	125621071869	15360	64	1591370180
elapsed	jampi	276893176980	20480	64	1591370460
elapsed	jampi	17393046603	2048	64	1591370480
elapsed	jampi	18452359575	4096	64	1591370502
elapsed	jampi	31543519636	8192	64	1591370536
elapsed	jampi	47449373932	10240	64	1591370587
elapsed	jampi	126062393406	15360	64	1591370716
elapsed	jampi	279293261419	20480	64	1591370998
elapsed	jampi	18456110760	4096	64	1591371040
elapsed	jampi	31954615975	8192	64	1591371075
elapsed	jampi	47814170047	10240	64	1591371126
elapsed	jampi	125551939531	15360	64	1591371254
elapsed	jampi	277064453838	20480	64	1591371535
elapsed	jampi	17354662827	2048	64	1591371555
elapsed	jampi	18383451886	4096	64	1591371577
elapsed	jampi	31674620107	8192	64	1591371611
elapsed	jampi	47579871633	10240	64	1591371662
elapsed	jampi	278262081934	20480	64	1591371964
elapsed	jampi	17378198328	2048	64	1591371984
elapsed	jampi	18486878651	4096	64	1591372006
elapsed	jampi	31892956948	8192	64	1591372041
elapsed	jampi	47646650032	10240	64	1591372091
elapsed	jampi	126134594464	15360	64	1591372221
elapsed	jampi	278997447077	20480	64	1591372503
elapsed	jampi	17329669569	2048	64	1591372523
elapsed	jampi	18383789923	4096	64	1591372544
elapsed	jampi	31783029068	8192	64	1591372579
elapsed	jampi	47685759713	10240	64	1591372630
elapsed	jampi	126639394303	15360	64	1591372760
elapsed	jampi	277955959469	20480	64	1591373041
elapsed	jampi	17419218998	2048	64	1591373061
elapsed	jampi	18438691264	4096	64	1591373083
elapsed	jampi	31855154809	8192	64	1591373117
elapsed	jampi	47565116349	10240	64	1591373168
elapsed	jampi	125148423892	15360	64	1591373296
elapsed	jampi	275919718706	20480	64	1591373575
elapsed	jampi	17361540454	2048	64	1591373596
elapsed	jampi	18319935293	4096	64	1591373617
elapsed	jampi	47734467295	10240	64	1591373688
elapsed	jampi	278437957332	20480	64	1591373990
elapsed	MLlib (op)	6864589910	1024	64	1591374003
elapsed	MLlib (op)	8464344827	2048	64	1591374017
elapsed	MLlib (op)	14472460090	4096	64	1591374038
elapsed	MLlib (op)	34568449680	8192	64	1591374078
elapsed	MLlib (op)	64094543931	10240	64	1591374148
elapsed	MLlib (op)	169518966949	15360	64	1591374324
elapsed	MLlib (op)	348619773406	20480	64	1591374678
elapsed	MLlib (op)	6780327568	1024	64	1591374691
elapsed	MLlib (op)	8774129675	2048	64	1591374706
elapsed	MLlib (op)	10778665707	4096	64	1591374722
elapsed	MLlib (op)	33413410119	8192	64	1591374762
elapsed	MLlib (op)	63657503617	10240	64	1591374831
elapsed	MLlib (op)	168236593545	15360	64	1591375006
elapsed	MLlib (op)	353034857265	20480	64	1591375365
elapsed	MLlib (op)	6640113201	1024	64	1591375377
elapsed	MLlib (op)	7900680895	2048	64	1591375391
elapsed	MLlib (op)	14542396091	4096	64	1591375412
elapsed	MLlib (op)	36709250032	8192	64	1591375454
elapsed	MLlib (op)	70775632459	10240	64	1591375531
elapsed	MLlib (op)	168838127102	15360	64	1591375706
elapsed	MLlib (op)	353278545736	20480	64	1591376065
elapsed	MLlib (op)	6851498923	1024	64	1591376078
elapsed	MLlib (op)	8872620258	2048	64	1591376092
elapsed	MLlib (op)	14330374173	4096	64	1591376113
elapsed	MLlib (op)	32204697689	8192	64	1591376151
elapsed	MLlib (op)	70035722467	10240	64	1591376227
elapsed	MLlib (op)	165358483151	15360	64	1591376398
elapsed	MLlib (op)	348308631918	20480	64	1591376752
elapsed	MLlib (op)	6673454542	1024	64	1591376765
elapsed	MLlib (op)	8046590971	2048	64	1591376779
elapsed	MLlib (op)	14368423884	4096	64	1591376799
elapsed	MLlib (op)	38167630927	8192	64	1591376843
elapsed	MLlib (op)	63074369324	10240	64	1591376912
elapsed	MLlib (op)	168696616334	15360	64	1591377087
elapsed	MLlib (op)	350451573685	20480	64	1591377444
elapsed	MLlib (op)	6330910202	1024	64	1591377456
elapsed	MLlib (op)	8744506490	2048	64	1591377470
elapsed	MLlib (op)	14154333175	4096	64	1591377490
elapsed	MLlib (op)	36023133974	8192	64	1591377532
elapsed	MLlib (op)	63494529864	10240	64	1591377602
elapsed	MLlib (op)	168293300902	15360	64	1591377776
elapsed	MLlib (op)	352469981778	20480	64	1591378135
elapsed	MLlib (op)	6672514467	1024	64	1591378147
elapsed	MLlib (op)	8060694042	2048	64	1591378161
elapsed	MLlib (op)	14581438546	4096	64	1591378182
elapsed	MLlib (op)	33846728507	8192	64	1591378222
elapsed	MLlib (op)	63161544709	10240	64	1591378291
elapsed	MLlib (op)	172031443578	15360	64	1591378469
elapsed	MLlib (op)	348360047289	20480	64	1591378823
elapsed	MLlib (op)	6797814512	1024	64	1591378836
elapsed	MLlib (op)	7908084284	2048	64	1591378850
elapsed	MLlib (op)	10737265935	4096	64	1591378867
elapsed	MLlib (op)	33325723575	8192	64	1591378906
elapsed	MLlib (op)	64171100158	10240	64	1591378976
elapsed	MLlib (op)	168659497994	15360	64	1591379151
elapsed	MLlib (op)	352639999204	20480	64	1591379510
elapsed	MLlib (op)	6852925868	1024	64	1591379522
elapsed	MLlib (op)	8823760097	2048	64	1591379537
elapsed	MLlib (op)	14577256925	4096	64	1591379558
elapsed	MLlib (op)	33158131565	8192	64	1591379597
elapsed	MLlib (op)	69122403707	10240	64	1591379672
elapsed	MLlib (op)	169496452518	15360	64	1591379847
elapsed	MLlib (op)	352771573018	20480	64	1591380206
elapsed	MLlib (op)	6603667431	1024	64	1591380219
elapsed	MLlib (op)	8162100642	2048	64	1591380233
elapsed	MLlib (op)	12192826993	4096	64	1591380251
elapsed	MLlib (op)	32095246347	8192	64	1591380289
elapsed	MLlib (op)	82864914067	10240	64	1591380378
elapsed	MLlib (op)	168434446528	15360	64	1591380552
elapsed	MLlib (op)	352420435616	20480	64	1591380911
elapsed	MLlib	6573935038	1024	64	1591380923
elapsed	MLlib	7798334370	2048	64	1591380937
elapsed	MLlib	10466232169	4096	64	1591380953
elapsed	MLlib	32112838706	8192	64	1591380991
elapsed	MLlib	63608049237	10240	64	1591381060
elapsed	MLlib	159326037550	15360	64	1591381226
elapsed	MLlib	386106586028	20480	64	1591381618
elapsed	MLlib	6673149212	1024	64	1591381630
elapsed	MLlib	7754978924	2048	64	1591381644
elapsed	MLlib	10885138127	4096	64	1591381660
elapsed	MLlib	31623143841	8192	64	1591381698
elapsed	MLlib	63117489538	10240	64	1591381767
elapsed	MLlib	158584848025	15360	64	1591381931
elapsed	MLlib	378498729346	20480	64	1591382316
elapsed	MLlib	6615489608	1024	64	1591382328
elapsed	MLlib	7954597195	2048	64	1591382342
elapsed	MLlib	10868361091	4096	64	1591382358
elapsed	MLlib	31763727815	8192	64	1591382396
elapsed	MLlib	64337139620	10240	64	1591382466
elapsed	MLlib	160597888593	15360	64	1591382633
elapsed	MLlib	366831947222	20480	64	1591383005
elapsed	MLlib	6608454579	1024	64	1591383018
elapsed	MLlib	7587549278	2048	64	1591383031
elapsed	MLlib	10772731884	4096	64	1591383048
elapsed	MLlib	31879611607	8192	64	1591383086
elapsed	MLlib	63168899297	10240	64	1591383155
elapsed	MLlib	158502798552	15360	64	1591383319
elapsed	MLlib	376776640863	20480	64	1591383702
elapsed	MLlib	6517670970	1024	64	1591383714
elapsed	MLlib	7709090904	2048	64	1591383728
elapsed	MLlib	10233618870	4096	64	1591383744
elapsed	MLlib	31445605857	8192	64	1591383781
elapsed	MLlib	62889964281	10240	64	1591383850
elapsed	MLlib	157287174264	15360	64	1591384013
elapsed	MLlib	379000771187	20480	64	1591384398
elapsed	MLlib	6628435129	1024	64	1591384410
elapsed	MLlib	7948475224	2048	64	1591384424
elapsed	MLlib	10741532917	4096	64	1591384441
elapsed	MLlib	31892519953	8192	64	1591384478
elapsed	MLlib	63230669938	10240	64	1591384547
elapsed	MLlib	160049472310	15360	64	1591384713
elapsed	MLlib	374398282517	20480	64	1591385094
elapsed	MLlib	6515619477	1024	64	1591385106
elapsed	MLlib	7787504432	2048	64	1591385119
elapsed	MLlib	10573641395	4096	64	1591385136
elapsed	MLlib	31670960022	8192	64	1591385173
elapsed	MLlib	62983573080	10240	64	1591385242
elapsed	MLlib	158611266847	15360	64	1591385406
elapsed	MLlib	380357390379	20480	64	1591385793
elapsed	MLlib	6616165250	1024	64	1591385805
elapsed	MLlib	7768707938	2048	64	1591385819
elapsed	MLlib	10714892363	4096	64	1591385835
elapsed	MLlib	31849281642	8192	64	1591385873
elapsed	MLlib	62550913322	10240	64	1591385941
elapsed	MLlib	160747905127	15360	64	1591386108
elapsed	MLlib	377815646419	20480	64	1591386491
elapsed	MLlib	6695673393	1024	64	1591386504
elapsed	MLlib	7720975315	2048	64	1591386517
elapsed	MLlib	10551516629	4096	64	1591386534
elapsed	MLlib	31562687191	8192	64	1591386571
elapsed	MLlib	62511232464	10240	64	1591386639
elapsed	MLlib	157969060755	15360	64	1591386803
elapsed	MLlib	389592522783	20480	64	1591387199
elapsed	MLlib	6515761404	1024	64	1591387211
elapsed	MLlib	8000603901	2048	64	1591387225
elapsed	MLlib	10592170692	4096	64	1591387241
elapsed	MLlib	31618078447	8192	64	1591387278
elapsed	MLlib	62625009235	10240	64	1591387347
elapsed	MLlib	157473569536	15360	64	1591387510
elapsed	MLlib	377062258283	20480	64	1591387893
elapsed	jampi	514547671332	25600	64	1591394188
elapsed	jampi	513185602997	25600	64	1591394704
elapsed	jampi	511712055478	25600	64	1591395219
elapsed	jampi	510696269095	25600	64	1591395733
elapsed	MLlib (op)	657723385299	25600	64	1591396908
elapsed	MLlib (op)	682725947554	25600	64	1591397597
elapsed	MLlib (op)	677212383105	25600	64	1591398280
elapsed	MLlib (op)	676966292528	25600	64	1591398963
elapsed	MLlib (op)	674883571553	25600	64	1591399644
elapsed	mpi	457752115488.052368	25600	64	1591406605
elapsed	mpi	457553462982.177734	25600	64	1591407408
elapsed	mpi	458661485195.159912	25600	64	1591408148
elapsed	mpi	458096065282.821655	25600	64	1591408897
elapsed	mpi	459138428688.049316	25600	64	1591409699
elapsed	mpi	10285635232.925415	2048	1	1591448162
elapsed	mpi	83547433376.312256	4096	1	1591448247
elapsed	mpi	726253103256.225586	8192	1	1591448983
elapsed	mpi	1460978188037.872314	10240	1	1591450461
elapsed	mpi	10278907775.878906	2048	1	1591450472
elapsed	mpi	83504612922.668457	4096	1	1591450557
elapsed	mpi	725410599708.557129	8192	1	1591451289
elapsed	mpi	1461196501970.291016	10240	1	1591452760
elapsed	mpi	10289313316.345215	2048	1	1591452772
elapsed	mpi	83474325180.053711	4096	1	1591452857
elapsed	mpi	726056683301.925659	8192	1	1591453589
elapsed	mpi	1461225585937.500000	10240	1	1591455060
elapsed	mpi	10262539863.586426	2048	1	1591455072
elapsed	mpi	83464744091.033936	4096	1	1591455157
elapsed	mpi	725543661355.972290	8192	1	1591455889
elapsed	mpi	1460956187009.811523	10240	1	1591457359
elapsed	mpi	10267917871.475220	2048	1	1591457371
elapsed	mpi	83518448114.395142	4096	1	1591457456
elapsed	mpi	725342704772.949219	8192	1	1591458188
elapsed	mpi	1461000116586.685059	10240	1	1591459659
elapsed	mpi	10288893461.227417	2048	1	1591459670
elapsed	mpi	83603034734.725952	4096	1	1591459756
elapsed	mpi	725048905372.619629	8192	1	1591460487
elapsed	mpi	1460782844543.457031	10240	1	1591461958
elapsed	mpi	10289162158.966064	2048	1	1591461969
elapsed	mpi	83417028427.124023	4096	1	1591462054
elapsed	mpi	725063356399.536133	8192	1	1591462786
elapsed	mpi	1461020623922.348145	10240	1	1591464257
elapsed	mpi	10284744739.532471	2048	1	1591464268
elapsed	mpi	83564209699.630737	4096	1	1591464353
elapsed	mpi	725092773199.081421	8192	1	1591465086
elapsed	mpi	1461441866636.276367	10240	1	1591466557
elapsed	mpi	10294149875.640869	2048	1	1591466569
elapsed	mpi	83472479343.414307	4096	1	1591466654
elapsed	mpi	724429451704.025269	8192	1	1591467385
elapsed	mpi	1460850277423.858643	10240	1	1591468855
elapsed	mpi	10293539524.078369	2048	1	1591468867
elapsed	mpi	83665150880.813599	4096	1	1591468952
elapsed	mpi	724338806629.180908	8192	1	1591469683
elapsed	mpi	1460972570419.311523	10240	1	1591471154
elapsed	jampi	23705459522	2048	1	1591479408
elapsed	jampi	87149193167	4096	1	1591479499
elapsed	jampi	579038775710	8192	1	1591480082
elapsed	jampi	1139829487259	10240	1	1591481227
elapsed	jampi	23768422181	2048	1	1591481255
elapsed	jampi	87403904157	4096	1	1591481346
elapsed	jampi	586796507400	8192	1	1591481937
elapsed	jampi	1144900514906	10240	1	1591483086
elapsed	jampi	23767784653	2048	1	1591483115
elapsed	jampi	87216697945	4096	1	1591483206
elapsed	jampi	588527168590	8192	1	1591483799
elapsed	jampi	1139372272471	10240	1	1591484942
elapsed	jampi	23604164130	2048	1	1591484970
elapsed	jampi	87581404469	4096	1	1591485062
elapsed	jampi	583821786589	8192	1	1591485650
elapsed	jampi	1143113107296	10240	1	1591486798
elapsed	jampi	23945266143	2048	1	1591486826
elapsed	jampi	87699922493	4096	1	1591486918
elapsed	jampi	582555857783	8192	1	1591487504
elapsed	jampi	1134254760886	10240	1	1591488643
elapsed	jampi	23873843518	2048	1	1591488671
elapsed	jampi	87799180565	4096	1	1591488763
elapsed	jampi	715825746223	8192	1	1591489483
elapsed	jampi	1144108516033	10240	1	1591490631
elapsed	jampi	23735764267	2048	1	1591490659
elapsed	jampi	89039981354	4096	1	1591490752
elapsed	jampi	581747396132	8192	1	1591491338
elapsed	jampi	1136419431406	10240	1	1591492478
elapsed	jampi	23690020569	2048	1	1591492507
elapsed	jampi	88044616861	4096	1	1591492599
elapsed	jampi	598775851306	8192	1	1591493202
elapsed	jampi	1153373643813	10240	1	1591494360
elapsed	jampi	23867833094	2048	1	1591494388
elapsed	jampi	88641768982	4096	1	1591494480
elapsed	jampi	588354824200	8192	1	1591495073
elapsed	jampi	1152905519131	10240	1	1591496230
elapsed	jampi	23575082833	2048	1	1591496258
elapsed	jampi	88534159689	4096	1	1591496351
elapsed	jampi	585196016777	8192	1	1591496940
elapsed	jampi	1144280148584	10240	1	1591498088
elapsed	MLlib (op)	11378997019	1024	1	1591498111
elapsed	MLlib (op)	36478665649	2048	1	1591498159
elapsed	MLlib (op)	158205120843	4096	1	1591498329
elapsed	MLlib (op)	848429129200	8192	1	1591499189
elapsed	MLlib (op)	1493207949571	10240	1	1591500694
elapsed	MLlib (op)	11502160541	1024	1	1591500717
elapsed	MLlib (op)	36571621797	2048	1	1591500765
elapsed	MLlib (op)	159793400683	4096	1	1591500936
elapsed	MLlib (op)	842286530075	8192	1	1591501790
elapsed	MLlib (op)	1481893936528	10240	1	1591503284
elapsed	MLlib (op)	11558133422	1024	1	1591503307
elapsed	MLlib (op)	36891572045	2048	1	1591503355
elapsed	MLlib (op)	158371509821	4096	1	1591503525
elapsed	MLlib (op)	841460872300	8192	1	1591504378
elapsed	MLlib (op)	1488609964409	10240	1	1591505879
elapsed	MLlib (op)	11490264840	1024	1	1591505902
elapsed	MLlib (op)	36445204256	2048	1	1591505950
elapsed	MLlib (op)	158418388589	4096	1	1591506120
elapsed	MLlib (op)	845404041925	8192	1	1591506977
elapsed	MLlib (op)	1494301143614	10240	1	1591508483
elapsed	MLlib (op)	11357776231	1024	1	1591508506
elapsed	MLlib (op)	36801586423	2048	1	1591508554
elapsed	MLlib (op)	160597782207	4096	1	1591508726
elapsed	MLlib (op)	846459738517	8192	1	1591509584
elapsed	MLlib (op)	1495941416307	10240	1	1591511092
elapsed	MLlib (op)	11636992976	1024	1	1591511116
elapsed	MLlib (op)	37396050921	2048	1	1591511165
elapsed	MLlib (op)	161958570758	4096	1	1591511339
elapsed	MLlib (op)	855580127580	8192	1	1591512206
elapsed	MLlib (op)	1514763843666	10240	1	1591513733
elapsed	MLlib (op)	11803871892	1024	1	1591513757
elapsed	MLlib (op)	37280504177	2048	1	1591513806
elapsed	MLlib (op)	161408392199	4096	1	1591513979
elapsed	MLlib (op)	851420441261	8192	1	1591514843
elapsed	MLlib (op)	1504092634956	10240	1	1591516359
elapsed	MLlib (op)	11631695018	1024	1	1591516382
elapsed	MLlib (op)	37094068926	2048	1	1591516431
elapsed	MLlib (op)	161811514895	4096	1	1591516604
elapsed	MLlib (op)	862273958814	8192	1	1591517478
elapsed	MLlib (op)	1505413529071	10240	1	1591518995
elapsed	MLlib (op)	11681879400	1024	1	1591519019
elapsed	MLlib (op)	37380749843	2048	1	1591519068
elapsed	MLlib (op)	162180015988	4096	1	1591519242
elapsed	MLlib (op)	860137270908	8192	1	1591520114
elapsed	MLlib (op)	1506053532525	10240	1	1591521632
elapsed	MLlib (op)	11659171795	1024	1	1591521655
elapsed	MLlib (op)	37163849856	2048	1	1591521704
elapsed	MLlib (op)	160903424615	4096	1	1591521877
elapsed	MLlib (op)	861673850370	8192	1	1591522750
elapsed	MLlib (op)	1514462136666	10240	1	1591524277
elapsed	MLlib	10457549543	1024	1	1591524297
elapsed	MLlib	34159422423	2048	1	1591524341
elapsed	MLlib	146559519997	4096	1	1591524497
elapsed	MLlib	10857106290	1024	1	1591527901
elapsed	MLlib	34328629280	2048	1	1591527945
elapsed	MLlib	149909459302	4096	1	159152810
elapsed	mpi	90845584.869385	2048	256	1591547763
elapsed	mpi	508051395.416260	4096	256	1591547786
elapsed	mpi	3657391071.319580	8192	256	1591547891
elapsed	mpi	6788643598.556519	10240	256	1591548057
elapsed	mpi	23658432722.091675	15360	256	1591548448
elapsed	mpi	51919967174.530029	20480	256	1591549168
elapsed	mpi	110677480.697632	2048	256	1591549177
elapsed	mpi	523675203.323364	4096	256	1591549201
elapsed	mpi	3655420780.181885	8192	256	1591549298
elapsed	mpi	6841194391.250610	10240	256	1591549448
elapsed	mpi	23537279129.028320	15360	256	1591549797
elapsed	mpi	51637153148.651123	20480	256	1591550481
elapsed	mpi	106971263.885498	2048	256	1591550490
elapsed	mpi	524760246.276855	4096	256	1591550514
elapsed	mpi	3682122945.785522	8192	256	1591550612
elapsed	mpi	6784238576.889038	10240	256	1591550768
elapsed	mpi	304653406.143188	2048	256	1591551872
elapsed	mpi	527047395.706177	4096	256	1591551896
elapsed	mpi	3860148668.289185	8192	256	1591551996
elapsed	mpi	6731435775.756836	10240	256	1591552154
elapsed	mpi	23507923364.639282	15360	256	1591552527
elapsed	mpi	51989029407.501221	20480	256	1591553234
elapsed	mpi	303211450.576782	2048	256	1591553243
elapsed	mpi	504670619.964600	4096	256	1591553267
elapsed	mpi	3689175128.936768	8192	256	1591553366
elapsed	mpi	6794105529.785156	10240	256	1591553522
elapsed	mpi	23702010154.724121	15360	256	1591553899
elapsed	mpi	51996868371.963501	20480	256	1591554619
elapsed	mpi	84575414.657593	2048	256	1591554627
elapsed	mpi	534474372.863770	4096	256	1591554651
elapsed	mpi	3860995769.500732	8192	256	1591554752
elapsed	mpi	6884977102.279663	10240	256	1591554909
elapsed	mpi	23751647949.218750	15360	256	1591555263
elapsed	mpi	51644433975.219727	20480	256	1591555946
elapsed	mpi	295374393.463135	2048	256	1591555954
elapsed	mpi	707595825.195312	4096	256	1591555978
elapsed	mpi	3709306716.918945	8192	256	1591556075
elapsed	mpi	6805208683.013916	10240	256	1591556230
elapsed	mpi	23687701225.280762	15360	256	1591556613
elapsed	mpi	51427115917.205811	20480	256	1591557296
elapsed	mpi	86799621.582031	2048	256	1591557305
elapsed	mpi	488856077.194214	4096	256	1591557329
elapsed	mpi	3696329116.821289	8192	256	1591557416
elapsed	mpi	6723302841.186523	10240	256	1591557568
elapsed	mpi	23626617908.477783	15360	256	1591557941
elapsed	mpi	52120414495.468140	20480	256	1591558663
elapsed	mpi	116169691.085815	2048	256	1591558672
elapsed	mpi	496278762.817383	4096	256	1591558697
elapsed	mpi	3641192436.218262	8192	256	1591558793
elapsed	mpi	6787484407.424927	10240	256	1591558951
elapsed	mpi	23774226188.659668	15360	256	1591559309
elapsed	mpi	51875129938.125610	20480	256	1591560012
elapsed	mpi	299563407.897949	2048	256	1591560021
elapsed	mpi	527804136.276245	4096	256	1591560044
elapsed	mpi	3673262596.130371	8192	256	1591560139
elapsed	mpi	6786805391.311646	10240	256	1591560297
elapsed	mpi	23612116098.403931	15360	256	1591560629
elapsed	mpi	52090553045.272827	20480	256	1591561374
elapsed	jampi	17410152538	2048	256	1591561395
elapsed	jampi	40204931811	15360	256	1591561498
elapsed	jampi	78417169437	20480	256	1591561580
elapsed	jampi	17328521615	2048	256	1591561600
elapsed	jampi	17648402880	4096	256	1591561621
elapsed	jampi	17681879784	4096	256	1591561742
elapsed	jampi	22419036121	10240	256	1591561787
elapsed	jampi	40431976325	15360	256	1591561831
elapsed	jampi	17230731743	2048	256	1591561871
elapsed	jampi	78256346989	20480	256	1591562033
elapsed	jampi	17250395793	2048	256	1591562053
elapsed	jampi	17676018533	4096	256	1591562074
elapsed	jampi	20001046435	8192	256	1591562097
elapsed	jampi	17233529621	2048	256	1591562178
elapsed	jampi	20074328014	8192	256	1591562221
elapsed	jampi	22324014905	10240	256	1591562246
elapsed	jampi	22335531388	10240	256	1591562372
elapsed	jampi	17664735455	4096	256	1591562452
elapsed	jampi	20015033571	8192	256	1591562475
elapsed	jampi	40011166870	15360	256	1591562539
elapsed	jampi	78446610023	20480	256	1591562620
elapsed	jampi	17229909250	2048	256	1591562641
elapsed	jampi	20009950627	8192	256	1591562684
elapsed	jampi	22319890259	10240	256	1591562709
elapsed	jampi	39992765074	15360	256	1591562752
elapsed	jampi	17334564127	2048	256	1591562793
elapsed	jampi	20020108821	8192	256	1591562836
elapsed	jampi	77949776738	20480	256	1591562957
elapsed	MLlib (op)	8053815887	2048	256	1591562984
elapsed	MLlib (op)	10198449092	4096	256	1591563000
elapsed	MLlib (op)	14897652270	8192	256	1591563021
elapsed	MLlib (op)	20101408868	10240	256	1591563047
elapsed	MLlib (op)	108841923897	20480	256	1591564163
elapsed	MLlib (op)	8045073611	2048	256	1591564190
elapsed	MLlib (op)	10310511069	4096	256	1591564206
elapsed	MLlib (op)	14856909864	8192	256	1591564227
elapsed	MLlib (op)	19930134503	10240	256	1591564253
elapsed	MLlib (op)	48980702152	15360	256	1591564308
elapsed	MLlib (op)	108787082324	20480	256	1591564423
elapsed	MLlib (op)	8000476336	2048	256	1591564450
elapsed	MLlib (op)	10126757968	4096	256	1591564466
elapsed	MLlib (op)	14959706005	8192	256	1591564487
elapsed	MLlib (op)	20020957167	10240	256	1591564513
elapsed	MLlib (op)	48311916001	15360	256	1591564568
elapsed	MLlib (op)	108958453742	20480	256	1591564683
elapsed	MLlib (op)	8070456279	2048	256	1591564710
elapsed	MLlib (op)	10220820330	4096	256	1591564726
elapsed	MLlib (op)	15296028875	8192	256	1591564747
elapsed	MLlib (op)	20464080774	10240	256	1591564774
elapsed	MLlib (op)	47987292706	15360	256	1591564828
elapsed	MLlib (op)	108713569686	20480	256	1591564943
elapsed	MLlib (op)	8094920346	2048	256	1591564970
elapsed	MLlib (op)	10164329501	4096	256	1591564986
elapsed	MLlib (op)	14922384164	8192	256	1591565007
elapsed	MLlib (op)	19975449924	10240	256	1591565033
elapsed	MLlib (op)	48735086122	15360	256	1591565088
elapsed	MLlib (op)	109303467828	20480	256	1591565203
elapsed	MLlib (op)	9921841192	2048	256	1591565234
elapsed	MLlib (op)	9922986930	4096	256	1591565250
elapsed	MLlib (op)	16269303046	8192	256	1591565272
elapsed	MLlib (op)	20465082497	10240	256	1591565298
elapsed	MLlib (op)	49455775036	15360	256	1591565354
elapsed	MLlib (op)	108074377254	20480	256	1591565468
elapsed	MLlib (op)	9466459361	2048	256	1591565497
elapsed	MLlib (op)	10850759973	4096	256	1591565514
elapsed	MLlib (op)	14911429129	8192	256	1591565535
elapsed	MLlib (op)	19986961504	10240	256	1591565561
elapsed	MLlib (op)	47856710080	15360	256	1591565615
elapsed	MLlib (op)	108202302206	20480	256	1591565729
elapsed	MLlib (op)	8066902350	2048	256	1591565757
elapsed	MLlib (op)	10018354486	4096	256	1591565773
elapsed	MLlib (op)	14947172904	8192	256	1591565794
elapsed	MLlib (op)	19458288493	10240	256	1591565819
elapsed	MLlib (op)	49401321058	15360	256	1591565874
elapsed	MLlib (op)	108571992746	20480	256	1591565989
elapsed	MLlib (op)	6706437302	1024	256	1591566002
elapsed	MLlib (op)	7915602822	2048	256	1591566016
elapsed	MLlib (op)	9974355618	4096	256	1591566032
elapsed	MLlib (op)	14795118557	8192	256	1591566053
elapsed	MLlib (op)	20259599825	10240	256	1591566079
elapsed	MLlib (op)	48904322472	15360	256	1591566134
elapsed	MLlib (op)	108766169234	20480	256	1591566249
elapsed	MLlib (op)	8011525946	2048	256	1591566276
elapsed	MLlib (op)	9796616180	4096	256	1591566292
elapsed	MLlib (op)	14927623972	8192	256	1591566312
elapsed	MLlib (op)	20209474535	10240	256	1591566339
elapsed	MLlib (op)	48130701955	15360	256	1591566393
elapsed	MLlib (op)	109360014656	20480	256	1591566508
elapsed	MLlib	6096873155	1024	256	1591566520
elapsed	MLlib	7785298040	2048	256	1591566534
elapsed	MLlib	9823800166	4096	256	1591566549
elapsed	MLlib	14954903416	8192	256	1591566570
elapsed	MLlib	20274501181	10240	256	1591566596
elapsed	MLlib	6096873155	1024	256	1591566520
elapsed	MLlib	7785298040	2048	256	1591566534
elapsed	MLlib	9823800166	4096	256	1591566549
elapsed	MLlib	14954903416	8192	256	1591566570
elapsed	MLlib	20274501181	10240	256	1591566596
elapsed	MLlib	46704812452	15360	256	1591566648
elapsed	MLlib	104435320140	20480	256	1591566758
elapsed	MLlib	6447262802	1024	256	1591566771
elapsed	MLlib	7873115376	2048	256	1591566784
elapsed	MLlib	9738617192	4096	256	1591566800
elapsed	MLlib	15214438729	8192	256	1591566821
elapsed	MLlib	19801408033	10240	256	1591566846
elapsed	MLlib	45848686897	15360	256	1591566898
elapsed	MLlib	104591027447	20480	256	1591567008
elapsed	MLlib	6367236597	1024	256	1591567021
elapsed	MLlib	7697882231	2048	256	1591567034
elapsed	MLlib	9786736048	4096	256	1591567049
elapsed	MLlib	15059810609	8192	256	1591567070
elapsed	MLlib	20144513369	10240	256	1591567096
elapsed	MLlib	46007544813	15360	256	1591567148
elapsed	MLlib	104009380511	20480	256	1591567258
elapsed	MLlib	6486257807	1024	256	1591567270
elapsed	MLlib	7910044683	2048	256	1591567284
elapsed	MLlib	9781408152	4096	256	1591567299
elapsed	MLlib	15029992085	8192	256	1591567320
elapsed	MLlib	19685497080	10240	256	1591567345
elapsed	MLlib	47012413308	15360	256	1591567398
elapsed	MLlib	104705802500	20480	256	1591567509
elapsed	MLlib	6413564426	1024	256	1591567521
elapsed	MLlib	7712927555	2048	256	1591567534
elapsed	MLlib	9830679344	4096	256	1591567550
elapsed	MLlib	15128052971	8192	256	1591567570
elapsed	MLlib	19996998575	10240	256	1591567596
elapsed	MLlib	46183906702	15360	256	1591567648
elapsed	MLlib	105729289593	20480	256	1591567760
elapsed	MLlib	6430932982	1024	256	1591567772
elapsed	MLlib	7693743811	2048	256	1591567785
elapsed	MLlib	9660814996	4096	256	1591567801
elapsed	MLlib	15547037739	8192	256	1591567822
elapsed	MLlib	20059818612	10240	256	1591567848
elapsed	MLlib	46640349418	15360	256	1591567900
elapsed	MLlib	103628582700	20480	256	1591568010
elapsed	MLlib	6439271092	1024	256	1591568022
elapsed	MLlib	7976818453	2048	256	1591568036
elapsed	MLlib	9716421316	4096	256	1591568051
elapsed	MLlib	15378244321	8192	256	1591568072
elapsed	MLlib	20656760023	10240	256	1591568099
elapsed	MLlib	46466651704	15360	256	1591568151
elapsed	MLlib	104693398769	20480	256	1591568261
elapsed	MLlib	6414934412	1024	256	1591568273
elapsed	MLlib	8110027705	2048	256	1591568287
elapsed	MLlib	9780853754	4096	256	1591568303
elapsed	MLlib	14945411401	8192	256	1591568324
elapsed	MLlib	19726406984	10240	256	1591568349
elapsed	MLlib	46201446891	15360	256	1591568401
elapsed	MLlib	104947203456	20480	256	1591568512
elapsed	MLlib	6509426410	1024	256	1591568524
elapsed	MLlib	7901895918	2048	256	1591568537
elapsed	MLlib	9519263271	4096	256	1591568552
elapsed	MLlib	15026336961	8192	256	1591568573
elapsed	MLlib	19880308027	10240	256	1591568599
elapsed	MLlib	46781299906	15360	256	1591568651
elapsed	MLlib	103763391118	20480	256	1591568761
elapsed	MLlib	6637563155	1024	256	1591568773
elapsed	MLlib	8117309627	2048	256	1591568787
elapsed	MLlib	9679171767	4096	256	1591568802
elapsed	MLlib	15061652658	8192	256	1591568823
elapsed	MLlib	19735545158	10240	256	1591568849
elapsed	MLlib	45716294602	15360	256	1591568900
elapsed	MLlib	104472032397	20480	256	1591569011
elapsed	mpi	113721323728.561401	25600	256	1591570976
elapsed	mpi	184519670009.613037	30720	256	1591573036
elapsed	jampi	140114221587	25600	256	1591573366
elapsed	jampi	229027160596	30720	256	1591573598
elapsed	jampi	139526116719	25600	256	1591573782
elapsed	jampi	139131360716	25600	256	1591573945
elapsed	jampi	139053717015	25600	256	1591574148
elapsed	jampi	228791547468	30720	256	1591574380
elapsed	jampi	139130176373	25600	256	1591574522
elapsed	jampi	228883782496	30720	256	1591574795
elapsed	jampi	226540801404	30720	256	1591575320
elapsed	jampi	138481737263	25600	256	1591575483
elapsed	jampi	139330902574	25600	256	1591575668
elapsed	jampi	227906187264	30720	256	1591575899
elapsed	jampi	139144864996	25600	256	1591576281
elapsed	jampi	228975536943	30720	256	1591576513
elapsed	jampi	973905507725	51200	256	1591577490
elapsed	jampi	139353342226	25600	256	1591577632
elapsed	jampi	974291009894	51200	256	1591578630
elapsed	jampi	139411847658	25600	256	1591578773
elapsed	jampi	977089536823	51200	256	1591579773
elapsed	jampi	227941521194	30720	256	1591580025
elapsed	jampi	139907859035	25600	256	1591580189
elapsed	jampi	139376923852	25600	256	1591580374
elapsed	jampi	229246412785	30720	256	1591580606
elapsed	jampi	974444438429	51200	256	1591581584
elapsed	jampi	138468145116	25600	256	1591581725
elapsed	MLlib (op)	185591764973	25600	256	1591581959
elapsed	MLlib (op)	285843384624	30720	256	1591582251
elapsed	MLlib (op)	187305410634	25600	256	1591583247
elapsed	MLlib (op)	287009863888	30720	256	1591583540
elapsed	MLlib (op)	186143624515	25600	256	1591584544
elapsed	MLlib (op)	286132242833	30720	256	1591584837
elapsed	MLlib (op)	186957148394	25600	256	1591585911
elapsed	MLlib (op)	287229786583	30720	256	1591586204
elapsed	MLlib (op)	186459959981	25600	256	1591587331
elapsed	MLlib (op)	285136874069	30720	256	1591587622
elapsed	MLlib (op)	186976364143	25600	256	1591588620
elapsed	MLlib (op)	286279955785	30720	256	1591588912
elapsed	MLlib (op)	184697150473	25600	256	1591589892
elapsed	MLlib (op)	286337270931	30720	256	1591590184
elapsed	MLlib (op)	186442619117	25600	256	1591591186
elapsed	MLlib (op)	287165103705	30720	256	1591591480
elapsed	MLlib (op)	184926426020	25600	256	1591592325
elapsed	MLlib (op)	289551338645	30720	256	1591592620
elapsed	MLlib (op)	185835104076	25600	256	1591593733
elapsed	MLlib (op)	287995726979	30720	256	1591594027
elapsed	MLlib	201358859864	25600	256	1591595093
elapsed	MLlib	374685862814	30720	256	1591595474
elapsed	MLlib	192044808991	25600	256	1591596740
elapsed	MLlib	388448731239	30720	256	1591597134
elapsed	MLlib	188706961487	25600	256	1591598388
elapsed	MLlib	371324869113	30720	256	1591598764
elapsed	MLlib	199881232855	25600	256	1591599159
elapsed	MLlib	377426197686	30720	256	1591599542
elapsed	MLlib	192159626671	25600	256	1591600267
elapsed	MLlib	373208137303	30720	256	1591600646
elapsed	MLlib	194442230603	25600	256	1591601977
elapsed	MLlib	384623439339	30720	256	1591602367
elapsed	MLlib	196927284951	25600	256	1591603094
elapsed	MLlib	370978967626	30720	256	1591603470
elapsed	MLlib	190278955598	25600	256	1591604454
elapsed	MLlib	380920412722	30720	256	1591604841
elapsed	MLlib	200538113921	25600	256	1591606180
elapsed	MLlib	380106666155	30720	256	1591606566
elapsed	MLlib	187311867769	25600	256	1591607669
elapsed	MLlib	380323643206	30720	256	1591608055
elapsed	mpi	115197847843.170166	25600	256	1591609344
elapsed	mpi	184532140254.974365	30720	256	1591609608
elapsed	mpi	114693535566.329956	25600	256	1591609732
elapsed	mpi	183930859088.897705	30720	256	1591609929
elapsed	mpi	114358299016.952515	25600	256	1591610054
elapsed	mpi	182522512674.331665	30720	256	1591610250
elapsed	mpi	115904743671.417236	25600	256	1591610376
elapsed	mpi	183246952772.140503	30720	256	1591610573
elapsed	mpi	115560274124.145508	25600	256	1591610699
elapsed	mpi	183286941289.901733	30720	256	1591610895
elapsed	MLlib (op)	1159159965864	51200	256	1591619224
elapsed	MLlib (op)	1153729385226	51200	256	1591620602
elapsed	MLlib (op)	1153729385226	51200	256	159162062
elapsed	MLlib (op)	1156719572080	51200	256	1591621766
elapsed	MLlib (op)	1153369224520	51200	256	1591622926
elapsed	MLlib (op)	1155276573740	51200	256	1591624088
elapsed	MLlib (op)	1156793905744	51200	256	1591625251
elapsed	MLlib (op)	1152675934814	51200	256	1591626411
elapsed	MLlib (op)	1157064227488	51200	256	1591627574
elapsed	mpi	320779323.577881	1024	16	1601313363
elapsed	mpi	2255928754.806519	2048	16	1601313367
elapsed	mpi	12491255283.355713	4096	16	1601313381
elapsed	mpi	126448175191.879272	8192	16	1601313512
elapsed	mpi	257179027557.373047	10240	16	1601313774
elapsed	mpi	694751367092.132568	15360	16	1601314478
elapsed	mpi	404401063.919067	1024	16	1601314483
elapsed	mpi	2468497991.561890	2048	16	1601314486
elapsed	mpi	13404703855.514526	4096	16	1601314502
elapsed	mpi	124937957286.834717	8192	16	1601314630
elapsed	mpi	254512658119.201660	10240	16	1601314890
elapsed	mpi	691620974063.873291	15360	16	1601315592
elapsed	mpi	448161840.438843	1024	16	1601315594
elapsed	mpi	1941522121.429443	2048	16	1601315597
elapsed	mpi	13279167652.130127	4096	16	1601315613
elapsed	mpi	126330397844.314575	8192	16	1601315743
elapsed	mpi	257046393156.051636	10240	16	1601316005
elapsed	mpi	696545956850.051880	15360	16	1601316711
elapsed	mpi	380422353.744507	1024	16	1601316713
elapsed	mpi	1926028490.066528	2048	16	1601316716
elapsed	mpi	12895972967.147827	4096	16	1601316731
elapsed	mpi	125447567224.502563	8192	16	1601316860
elapsed	mpi	259055173158.645630	10240	16	1601317125
elapsed	mpi	695502814769.744873	15360	16	1601317830
elapsed	mpi	352059364.318848	1024	16	1601317832
elapsed	mpi	1771638393.402100	2048	16	1601317835
elapsed	mpi	13273274898.529053	4096	16	1601317850
elapsed	mpi	125018750429.153442	8192	16	1601317979
elapsed	mpi	261667673826.217651	10240	16	1601318247
elapsed	mpi	693179484844.207764	15360	16	1601318949
elapsed	mpi	388237714.767456	1024	16	1601318950
elapsed	mpi	1808931827.545166	2048	16	1601318953
elapsed	mpi	13608711719.512939	4096	16	1601318969
elapsed	mpi	126657631874.084473	8192	16	1601319100
elapsed	mpi	259297070503.234863	10240	16	1601319366
elapsed	mpi	704131208181.381226	15360	16	1601320080
elapsed	mpi	392376899.719238	1024	16	1601320082
elapsed	mpi	1968907833.099365	2048	16	1601320085
elapsed	mpi	12527927160.263062	4096	16	1601320099
elapsed	mpi	126647738456.726074	8192	16	1601320230
elapsed	mpi	258981080055.236816	10240	16	1601320494
elapsed	mpi	698641058683.395386	15360	16	1601321201
elapsed	mpi	404478073.120117	1024	16	1601321203
elapsed	mpi	2040768146.514893	2048	16	1601321206
elapsed	mpi	12572724342.346191	4096	16	1601321221
elapsed	mpi	125107281923.294067	8192	16	1601321350
elapsed	mpi	256482431888.580322	10240	16	1601321613
elapsed	mpi	691403329133.987427	15360	16	1601322313
elapsed	mpi	281954765.319824	1024	16	1601322315
elapsed	mpi	2055034160.614014	2048	16	1601322318
elapsed	mpi	14104932069.778442	4096	16	1601322334
elapsed	mpi	124217147588.729858	8192	16	1601322462
elapsed	mpi	257478526353.836060	10240	16	1601322724
elapsed	mpi	691981334447.860718	15360	16	1601323426
elapsed	mpi	356804847.717285	1024	16	1601323428
elapsed	mpi	1841807126.998901	2048	16	1601323431
elapsed	mpi	13720001697.540283	4096	16	1601323447
elapsed	mpi	126382724523.544312	8192	16	1601323577
elapsed	mpi	258017432451.248169	10240	16	1601323841
elapsed	mpi	697212926864.624023	15360	16	1601324549
elapsed	mpi	333923578.262329	1024	16	1601324550
elapsed	mpi	2123103380.203247	2048	16	1601324553
elapsed	mpi	13598016500.473022	4096	16	1601324569
elapsed	mpi	125303387641.906738	8192	16	1601324698
elapsed	mpi	257458264589.309692	10240	16	1601324961
elapsed	mpi	693585531711.578369	15360	16	1601325664
elapsed	mpi	382455348.968506	1024	16	1601325665
elapsed	mpi	2161326408.386230	2048	16	1601325669
elapsed	mpi	13372296333.312988	4096	16	1601325684
elapsed	mpi	126125943183.898926	8192	16	1601325813
elapsed	mpi	258550491571.426392	10240	16	1601326077
elapsed	mpi	691821265459.060669	15360	16	1601326778
elapsed	mpi	389718294.143677	1024	16	1601326779
elapsed	mpi	2045483350.753784	2048	16	1601326782
elapsed	mpi	12996620178.222656	4096	16	1601326798
elapsed	mpi	125322520017.623901	8192	16	1601326927
elapsed	mpi	256292273283.004761	10240	16	1601327188
elapsed	mpi	687369472742.080688	15360	16	1601327885
elapsed	mpi	384176731.109619	1024	16	1601327889
elapsed	mpi	1998863220.214844	2048	16	1601327892
elapsed	mpi	13044095039.367676	4096	16	1601327907
elapsed	mpi	125435282707.214355	8192	16	1601328036
elapsed	mpi	255857595205.307007	10240	16	1601328298
elapsed	mpi	693009596109.390259	15360	16	1601329000
elapsed	mpi	400180816.650391	1024	16	1601329001
elapsed	mpi	1912703275.680542	2048	16	1601329004
elapsed	mpi	12738598585.128784	4096	16	1601329019
elapsed	mpi	128156957626.342773	8192	16	1601329151
elapsed	mpi	260797816276.550293	10240	16	1601329417
elapsed	mpi	697854273796.081543	15360	16	1601330124
elapsed	mpi	349793672.561646	1024	16	1601330125
elapsed	mpi	2245188951.492310	2048	16	1601330129
elapsed	mpi	12791789293.289185	4096	16	1601330144
elapsed	mpi	124196305036.544800	8192	16	1601330272
elapsed	mpi	255901754379.272461	10240	16	1601330535
elapsed	mpi	693546701431.274414	15360	16	1601331238
elapsed	mpi	352770090.103149	1024	16	1601331239
elapsed	mpi	2329503536.224365	2048	16	1601331243
elapsed	mpi	12772290229.797363	4096	16	1601331258
elapsed	mpi	125147003650.665283	8192	16	1601331387
elapsed	mpi	256119014501.571655	10240	16	1601331648
elapsed	mpi	689812824726.104736	15360	16	1601332348
elapsed	mpi	344233036.041260	1024	16	1601332349
elapsed	mpi	2337961912.155151	2048	16	1601332353
elapsed	mpi	14706341266.632080	4096	16	1601332370
elapsed	mpi	124218520164.489746	8192	16	1601332498
elapsed	mpi	257673847675.323486	10240	16	1601332761
elapsed	mpi	688734185457.229614	15360	16	1601333459
elapsed	mpi	308662652.969360	1024	16	1601333460
elapsed	mpi	1843311071.395874	2048	16	1601333464
elapsed	mpi	13109832048.416138	4096	16	1601333478
elapsed	mpi	126185520410.537720	8192	16	1601333609
elapsed	mpi	256609268188.476562	10240	16	1601333870
elapsed	mpi	691066155672.073364	15360	16	1601334572
elapsed	mpi	350243091.583252	1024	16	1601334573
elapsed	mpi	1910416126.251221	2048	16	1601334576
elapsed	mpi	13021171331.405640	4096	16	1601334591
elapsed	mpi	129126576900.482178	8192	16	1601334724
elapsed	mpi	263191933155.059814	10240	16	1601334993
elapsed	mpi	688618835687.637329	15360	16	1601335691
elapsed	mpi	320309877.395630	1024	16	1601335692
elapsed	mpi	1871253013.610840	2048	16	1601335695
elapsed	mpi	12602055311.203003	4096	16	1601335710
elapsed	mpi	123710043907.165527	8192	16	1601335838
elapsed	mpi	256371374845.504761	10240	16	1601336099
elapsed	mpi	697115509033.203125	15360	16	1601336805
elapsed	mpi	356202125.549316	1024	16	1601336806
elapsed	mpi	2204957485.198975	2048	16	1601336810
elapsed	mpi	12972406864.166260	4096	16	1601336825
elapsed	mpi	124321910381.317139	8192	16	1601336953
elapsed	mpi	257253873348.236084	10240	16	1601337219
elapsed	mpi	692582129001.617432	15360	16	1601337921
elapsed	mpi	412165164.947510	1024	16	1601337922
elapsed	mpi	1896555662.155151	2048	16	1601337925
elapsed	mpi	12764308929.443359	4096	16	1601337940
elapsed	mpi	124939538002.014160	8192	16	1601338069
elapsed	mpi	257725797414.779663	10240	16	1601338332
elapsed	mpi	694250815868.377686	15360	16	1601339035
elapsed	mpi	348228454.589844	1024	16	1601339037
elapsed	mpi	2245231628.417969	2048	16	1601339040
elapsed	mpi	14684606075.286865	4096	16	1601339057
elapsed	mpi	124823306798.934937	8192	16	1601339186
elapsed	mpi	255170033216.476440	10240	16	1601339445
elapsed	mpi	687238843679.428101	15360	16	1601340144
elapsed	mpi	308178186.416626	1024	16	1601340145
elapsed	mpi	1444133758.544922	2048	16	1601340147
elapsed	mpi	10837771654.129028	4096	16	1601340160
elapsed	mpi	117578926563.262939	8192	16	1601340280
elapsed	mpi	238644709110.260010	10240	16	1601340523
elapsed	mpi	591269255399.703979	15360	16	1601341125
elapsed	mpi	296253919.601440	1024	16	1601341129
elapsed	mpi	1907144069.671631	2048	16	1601341132
elapsed	mpi	10509040355.682373	4096	16	1601341144
elapsed	mpi	117519252300.262451	8192	16	1601341265
elapsed	mpi	231356751203.536987	10240	16	1601341501
elapsed	mpi	596200959444.046021	15360	16	1601342108
elapsed	mpi	355582237.243652	1024	16	1601342110
elapsed	mpi	1716592550.277710	2048	16	1601342113
elapsed	mpi	12082224845.886230	4096	16	1601342126
elapsed	mpi	111791592597.961426	8192	16	1601342241
elapsed	mpi	234608613491.058350	10240	16	1601342481
elapsed	mpi	595324922323.226929	15360	16	1601343085
elapsed	mpi	375162839.889526	1024	16	1601343087
elapsed	mpi	1752320766.448975	2048	16	1601343089
elapsed	mpi	10680414438.247681	4096	16	1601343101
elapsed	mpi	116152814626.693726	8192	16	1601343221
elapsed	mpi	237756760120.391846	10240	16	1601343463
elapsed	mpi	591568018674.850464	15360	16	1601344062
elapsed	mpi	351673841.476440	1024	16	1601344067
elapsed	mpi	1823964834.213257	2048	16	1601344070
elapsed	mpi	10980495929.718018	4096	16	1601344082
elapsed	mpi	113076566457.748413	8192	16	1601344199
elapsed	mpi	222061977624.893188	10240	16	1601344426
elapsed	mpi	598213777542.114258	15360	16	1601345033
elapsed	mpi	394059419.631958	1024	16	1601345034
elapsed	mpi	1775678396.224976	2048	16	1601345037
elapsed	mpi	11547017097.473145	4096	16	1601345050
elapsed	mpi	113139991998.672485	8192	16	1601345167
elapsed	mpi	230043243169.784546	10240	16	1601345401
elapsed	mpi	645213789939.880371	15360	16	1601346054
elapsed	mpi	354921102.523804	1024	16	1601346056
elapsed	mpi	1524922609.329224	2048	16	1601346058
elapsed	mpi	12019170522.689819	4096	16	1601346072
elapsed	mpi	108057751893.997192	8192	16	1601346183
elapsed	mpi	220325607061.386108	10240	16	1601346408
elapsed	mpi	685856644392.013550	15360	16	1601347102
elapsed	mpi	344175100.326538	1024	16	1601347103
elapsed	mpi	1966299772.262573	2048	16	1601347106
elapsed	mpi	10846842050.552368	4096	16	1601347118
elapsed	mpi	106983572483.062744	8192	16	1601347229
elapsed	mpi	221169606924.057007	10240	16	1601347454
elapsed	mpi	654084446430.206299	15360	16	1601348118
elapsed	mpi	368273973.464966	1024	16	1601348119
elapsed	mpi	1519358873.367310	2048	16	1601348122
elapsed	mpi	10693398952.484131	4096	16	1601348134
elapsed	mpi	114132456302.642822	8192	16	1601348251
elapsed	mpi	221222705125.808716	10240	16	1601348478
elapsed	mpi	592934783697.128296	15360	16	1601349080
elapsed	mpi	308182716.369629	1024	16	1601349081
elapsed	mpi	1834334135.055542	2048	16	1601349084
elapsed	mpi	10648266792.297363	4096	16	1601349096
elapsed	mpi	114003077507.019043	8192	16	1601349213
elapsed	mpi	235396295785.903931	10240	16	1601349455
elapsed	mpi	604828496694.564819	15360	16	1601350071
elapsed	mpi	286547660.827637	1024	16	1601350072
elapsed	mpi	1654423475.265503	2048	16	1601350075
elapsed	mpi	11305573463.439941	4096	16	1601350088
elapsed	mpi	106392219305.038452	8192	16	1601350197
elapsed	mpi	234612280130.386353	10240	16	1601350436
elapsed	mpi	671568813800.811768	15360	16	1601351119
elapsed	mpi	281896352.767944	1024	16	1601351120
elapsed	mpi	1706464767.456055	2048	16	1601351123
elapsed	mpi	11848280906.677246	4096	16	1601351137
elapsed	mpi	108680991411.209106	8192	16	1601351249
elapsed	mpi	235382245302.200317	10240	16	1601351488
elapsed	mpi	590730463266.372681	15360	16	1601352086
elapsed	mpi	228440523.147583	1024	16	1601352088
elapsed	mpi	1727920055.389404	2048	16	1601352090
elapsed	mpi	10563986301.422119	4096	16	1601352103
elapsed	mpi	114524674177.169800	8192	16	1601352220
elapsed	mpi	221758695363.998413	10240	16	1601352446
elapsed	mpi	680121069908.142090	15360	16	1601353137
elapsed	mpi	312786102.294922	1024	16	1601353138
elapsed	mpi	1663019418.716431	2048	16	1601353141
elapsed	mpi	11570897817.611694	4096	16	1601353154
elapsed	mpi	106827038049.697876	8192	16	1601353264
elapsed	mpi	234578361272.811890	10240	16	1601353503
elapsed	mpi	644043044090.270996	15360	16	1601354155
elapsed	mpi	297917366.027832	1024	16	1601354156
elapsed	mpi	1628279685.974121	2048	16	1601354159
elapsed	mpi	11650302171.707153	4096	16	1601354172
elapsed	mpi	103704268693.923950	8192	16	1601354279
elapsed	mpi	232766787767.410278	10240	16	1601354516
elapsed	mpi	650176916837.692261	15360	16	1601355174
elapsed	mpi	298523426.055908	1024	16	1601355175
elapsed	mpi	1724641561.508179	2048	16	1601355178
elapsed	mpi	11419881820.678711	4096	16	1601355191
elapsed	mpi	114765366077.423096	8192	16	1601355310
elapsed	mpi	219752637863.159180	10240	16	1601355534
elapsed	mpi	667610842943.191528	15360	16	1601356210
elapsed	mpi	329775333.404541	1024	16	1601356211
elapsed	mpi	1689033031.463623	2048	16	1601356214
elapsed	mpi	11172392368.316650	4096	16	1601356227
elapsed	mpi	116014645099.639893	8192	16	1601356346
elapsed	mpi	234826801538.467407	10240	16	1601356585
elapsed	mpi	595322346925.735474	15360	16	1601357188
elapsed	mpi	352522611.618042	1024	16	1601357189
elapsed	mpi	1800010681.152344	2048	16	1601357192
elapsed	mpi	10782847166.061401	4096	16	1601357204
elapsed	mpi	116930270910.263062	8192	16	1601357324
elapsed	mpi	238769292116.165161	10240	16	1601357567
elapsed	mpi	657396822690.963745	15360	16	1601358232
elapsed	mpi	344275236.129761	1024	16	1601358234
elapsed	mpi	1817009925.842285	2048	16	1601358236
elapsed	mpi	11584334135.055542	4096	16	1601358250
elapsed	mpi	106219387054.443359	8192	16	1601358359
elapsed	mpi	239661911964.416504	10240	16	1601358603
elapsed	mpi	672394480228.424072	15360	16	1601359283
elapsed	mpi	317819118.499756	1024	16	1601359285
elapsed	mpi	1577895402.908325	2048	16	1601359287
elapsed	mpi	12333615064.620972	4096	16	1601359301
elapsed	mpi	107935464382.171631	8192	16	1601359413
elapsed	mpi	234867837905.883789	10240	16	1601359652
elapsed	mpi	681221425771.713257	15360	16	1601360341
elapsed	mpi	397709131.240845	1024	16	1601360342
elapsed	mpi	1574704408.645630	2048	16	1601360345
elapsed	mpi	11439842939.376831	4096	16	1601360358
elapsed	mpi	114429804325.103760	8192	16	1601360476
elapsed	mpi	221536588668.823242	10240	16	1601360701
elapsed	mpi	593537483692.169189	15360	16	1601361303
elapsed	mpi	278572797.775269	1024	16	1601361304
elapsed	mpi	1598131179.809570	2048	16	1601361307
elapsed	mpi	11184174537.658691	4096	16	1601361320
elapsed	mpi	113248077630.996704	8192	16	1601361436
elapsed	mpi	234806385517.120361	10240	16	1601361675
elapsed	mpi	631634027481.079102	15360	16	1601362316
elapsed	mpi	367129802.703857	1024	16	1601362342
elapsed	mpi	1710140466.690063	2048	16	1601362345
elapsed	mpi	11729553937.911987	4096	16	1601362358
elapsed	mpi	107651581048.965454	8192	16	1601362469
elapsed	mpi	237176744699.478149	10240	16	1601362711
elapsed	mpi	673078421592.712402	15360	16	1601363392
elapsed	mpi	342814445.495605	1024	16	1601363393
elapsed	mpi	1793068170.547485	2048	16	1601363396
elapsed	mpi	12332348108.291626	4096	16	1601363410
elapsed	mpi	113507669448.852539	8192	16	1601363527
elapsed	mpi	235787297487.258911	10240	16	1601363767
elapsed	mpi	662325702905.654907	15360	16	1601364437
elapsed	mpi	300891637.802124	1024	16	1601364439
elapsed	mpi	1817546844.482422	2048	16	1601364442
elapsed	mpi	10803897380.828857	4096	16	1601364454
elapsed	mpi	116881701707.839966	8192	16	1601364575
elapsed	mpi	220770655870.437622	10240	16	1601364801
elapsed	mpi	645994678497.314453	15360	16	1601365455
elapsed	mpi	278483152.389526	1024	16	1601365481
elapsed	mpi	1589038372.039795	2048	16	1601365483
elapsed	mpi	11450902938.842773	4096	16	1601365496
elapsed	mpi	106542247533.798218	8192	16	1601365606
elapsed	mpi	232635056018.829346	10240	16	1601365843
elapsed	mpi	683300084829.330444	15360	16	1601366536
elapsed	mpi	316833496.093750	1024	16	1601366537
elapsed	mpi	1692977666.854858	2048	16	1601366540
elapsed	mpi	11820450782.775879	4096	16	1601366554
elapsed	mpi	106177831888.198853	8192	16	1601366663
elapsed	mpi	229293488502.502441	10240	16	1601366896
elapsed	mpi	655488188028.335571	15360	16	1601367563
elapsed	mpi	311587810.516357	1024	16	1601367564
elapsed	mpi	1632755279.541016	2048	16	1601367567
elapsed	mpi	11206549882.888794	4096	16	1601367579
elapsed	mpi	113885126113.891602	8192	16	1601367696
elapsed	mpi	233658752918.243408	10240	16	1601367934
elapsed	mpi	585806225061.416626	15360	16	1601368528
elapsed	mpi	360210657.119751	1024	16	1601368529
elapsed	mpi	1865098714.828491	2048	16	1601368532
elapsed	mpi	10874440431.594849	4096	16	1601368545
elapsed	mpi	117567128896.713257	8192	16	1601368666
elapsed	mpi	223068992853.164673	10240	16	1601368894
elapsed	mpi	673552660942.077637	15360	16	1601369576
elapsed	mpi	340383291.244507	1024	16	1601369577
elapsed	mpi	1605053663.253784	2048	16	1601369580
elapsed	mpi	11064747571.945190	4096	16	1601369593
elapsed	mpi	115734748363.494873	8192	16	1601369712
elapsed	mpi	234782580375.671387	10240	16	1601369950
elapsed	mpi	590095378398.895264	15360	16	1601370548
elapsed	mpi	267664670.944214	1024	16	1601370551
elapsed	mpi	1847470283.508301	2048	16	1601370554
elapsed	mpi	11729581832.885742	4096	16	1601370567
elapsed	mpi	106723493099.212646	8192	16	1601370677
elapsed	mpi	221084542989.730835	10240	16	1601370902
elapsed	mpi	683159522771.835327	15360	16	1601371594
elapsed	mpi	351792335.510254	1024	16	1601371595
elapsed	mpi	1591929912.567139	2048	16	1601371598
elapsed	mpi	11310530662.536621	4096	16	1601371611
elapsed	mpi	113765416622.161865	8192	16	1601371728
elapsed	mpi	223606021165.847778	10240	16	1601371956
elapsed	mpi	677726872444.152832	15360	16	1601372642
elapsed	mpi	324232101.440430	1024	16	1601372644
elapsed	mpi	1802569389.343262	2048	16	1601372646
elapsed	mpi	11875899791.717529	4096	16	1601372660
elapsed	mpi	114811635017.395020	8192	16	1601372778
elapsed	mpi	219336605548.858643	10240	16	1601373004
elapsed	mpi	687615730762.481689	15360	16	1601373700
elapsed	mpi	288254022.598267	1024	16	1601373701
elapsed	mpi	1672976016.998291	2048	16	1601373704
elapsed	mpi	10704762220.382690	4096	16	1601373717
elapsed	mpi	115380066871.643066	8192	16	1601373835
elapsed	mpi	233236010074.615479	10240	16	1601374073
elapsed	mpi	612530783653.259277	15360	16	1601374696
elapsed	mpi	315995216.369629	1024	16	1601374723
elapsed	mpi	1887618303.298950	2048	16	1601374726
elapsed	mpi	11000532627.105713	4096	16	1601374738
elapsed	mpi	117511015176.773071	8192	16	1601374859
elapsed	mpi	232920830011.367798	10240	16	1601375097
elapsed	mpi	596778831481.933594	15360	16	1601375702
elapsed	mpi	282262325.286865	1024	16	1601375703
elapsed	mpi	1632693290.710449	2048	16	1601375706
elapsed	mpi	10689292192.459106	4096	16	1601375718
elapsed	mpi	107836273908.615112	8192	16	1601375829
elapsed	mpi	239718560934.066772	10240	16	1601376073
elapsed	mpi	677534632682.800293	15360	16	1601376759
elapsed	mpi	360239505.767822	1024	16	1601376760
elapsed	mpi	1690068483.352661	2048	16	1601376763
elapsed	mpi	11109585046.768188	4096	16	1601376776
elapsed	mpi	106307138919.830322	8192	16	1601376885
elapsed	mpi	220518079757.690430	10240	16	1601377111
elapsed	mpi	682331111907.958984	15360	16	1601377801
elapsed	mpi	256216287.612915	1024	16	1601377802
elapsed	mpi	1624981403.350830	2048	16	1601377805
elapsed	mpi	10747183561.325073	4096	16	1601377818
elapsed	mpi	108050847768.783569	8192	16	1601377929
elapsed	mpi	239718641757.965088	10240	16	1601378173
elapsed	mpi	653764227151.870728	15360	16	1601378835
elapsed	mpi	316267013.549805	1024	16	1601378865
elapsed	mpi	1519406080.245972	2048	16	1601378867
elapsed	mpi	11187154769.897461	4096	16	1601378880
elapsed	mpi	108814299821.853638	8192	16	1601378993
elapsed	mpi	220662445306.777954	10240	16	1601379218
elapsed	mpi	656853493452.072144	15360	16	1601379883
elapsed	mpi	380230188.369751	1024	16	1601379884
elapsed	mpi	1640395402.908325	2048	16	1601379887
elapsed	mpi	10908371210.098267	4096	16	1601379899
elapsed	mpi	112760353565.216064	8192	16	1601380015
elapsed	mpi	227320547580.718994	10240	16	1601380248
elapsed	mpi	583152921438.217163	15360	16	1601380841
elapsed	mpi	342034339.904785	1024	16	1601380842
elapsed	mpi	1761324882.507324	2048	16	1601380845
elapsed	mpi	11758869886.398315	4096	16	1601380858
elapsed	mpi	107834086894.989014	8192	16	1601380970
elapsed	mpi	237973065614.700317	10240	16	1601381213
elapsed	mpi	674610548734.664917	15360	16	1601381895
elapsed	mpi	290185451.507568	1024	16	1601381896
elapsed	mpi	1807380199.432373	2048	16	1601381899
elapsed	mpi	11203818798.065186	4096	16	1601381912
elapsed	mpi	115447758674.621582	8192	16	1601382030
elapsed	mpi	238046510696.411133	10240	16	1601382272
elapsed	mpi	669857862234.115601	15360	16	1601382950
elapsed	mpi	281571626.663208	1024	16	1601382951
elapsed	mpi	1514482259.750366	2048	16	1601382954
elapsed	mpi	10346892595.291138	4096	16	1601382966
elapsed	mpi	112878569841.384888	8192	16	1601383082
elapsed	mpi	231997640848.159790	10240	16	1601383318
elapsed	mpi	659873263120.651245	15360	16	1601383986
elapsed	mpi	307273626.327515	1024	16	1601383987
elapsed	mpi	1774027824.401855	2048	16	1601383990
elapsed	mpi	11052493810.653687	4096	16	1601384002
elapsed	mpi	112058168649.673462	8192	16	1601384118
elapsed	mpi	222634378194.808960	10240	16	1601384346
elapsed	mpi	683778897762.298584	15360	16	1601385038
elapsed	mpi	364018201.828003	1024	16	1601385039
elapsed	mpi	1708982467.651367	2048	16	1601385042
elapsed	mpi	11773425340.652466	4096	16	1601385055
elapsed	mpi	113930704593.658447	8192	16	1601385172
elapsed	mpi	232314035415.649414	10240	16	1601385409
elapsed	mpi	598045224905.014038	15360	16	1601386015
elapsed	mpi	294292449.951172	1024	16	1601386017
elapsed	mpi	1561904191.970825	2048	16	1601386019
elapsed	mpi	10943766832.351685	4096	16	1601386032
elapsed	mpi	115634429216.384888	8192	16	1601386150
elapsed	mpi	234293670654.296875	10240	16	1601386389
elapsed	mpi	597687026262.283325	15360	16	1601386998
elapsed	mpi	333034753.799438	1024	16	1601387000
elapsed	mpi	1529109239.578247	2048	16	1601387002
elapsed	mpi	11128158807.754517	4096	16	1601387015
elapsed	mpi	115398745775.222778	8192	16	1601387134
elapsed	mpi	230374044656.753540	10240	16	1601387368
elapsed	mpi	622792463064.193726	15360	16	1601387999
elapsed	mpi	312365770.339966	1024	16	1601388003
elapsed	mpi	1638957262.039185	2048	16	1601388006
elapsed	mpi	11151026010.513306	4096	16	1601388018
elapsed	mpi	107372948646.545410	8192	16	1601388129
elapsed	mpi	235670199871.063232	10240	16	1601388370
elapsed	mpi	597253165721.893311	15360	16	1601388976
elapsed	mpi	308089017.868042	1024	16	1601388977
elapsed	mpi	1811801195.144653	2048	16	1601388980
elapsed	mpi	12023545742.034912	4096	16	1601388993
elapsed	mpi	116875353813.171387	8192	16	1601389114
elapsed	mpi	241251030683.517456	10240	16	1601389359
elapsed	mpi	646893625736.236572	15360	16	1601390014
elapsed	mpi	372120618.820190	1024	16	1601390015
elapsed	mpi	1805663108.825684	2048	16	1601390018
elapsed	mpi	11433464050.292969	4096	16	1601390031
elapsed	mpi	113190385341.644287	8192	16	1601390147
elapsed	mpi	238287120819.091797	10240	16	1601390390
elapsed	mpi	597063508033.752441	15360	16	1601390995
elapsed	mpi	384146451.950073	1024	16	1601390997
elapsed	mpi	1692967176.437378	2048	16	1601390999
elapsed	mpi	11029843330.383301	4096	16	1601391012
elapsed	mpi	115093041419.982910	8192	16	1601391131
elapsed	mpi	242153455495.834351	10240	16	1601391380
elapsed	mpi	656475657701.492310	15360	16	1601392044
elapsed	mpi	304128646.850586	1024	16	1601392068
elapsed	mpi	1560968160.629272	2048	16	1601392070
elapsed	mpi	11435214281.082153	4096	16	1601392083
elapsed	mpi	111930977106.094360	8192	16	1601392199
elapsed	mpi	221691189050.674438	10240	16	1601392425
elapsed	mpi	652639191389.083862	15360	16	1601393086
elapsed	mpi	276593685.150146	1024	16	1601393090
elapsed	mpi	1652567148.208618	2048	16	1601393093
elapsed	mpi	10784183263.778687	4096	16	1601393105
elapsed	mpi	107722801685.333252	8192	16	1601393216
elapsed	mpi	237917116165.161133	10240	16	1601393458
elapsed	mpi	655511447191.238403	15360	16	1601394122
elapsed	mpi	299413442.611694	1024	16	1601394123
elapsed	mpi	1616543769.836426	2048	16	1601394125
elapsed	mpi	11794643163.681030	4096	16	1601394139
elapsed	mpi	106774030685.424805	8192	16	1601394249
elapsed	mpi	219757133245.468140	10240	16	1601394473
elapsed	mpi	594772800445.556641	15360	16	1601395077
elapsed	mpi	352820158.004761	1024	16	1601395078
elapsed	mpi	1617107629.776001	2048	16	1601395081
elapsed	mpi	11688911199.569702	4096	16	1601395094
elapsed	mpi	117626393556.594849	8192	16	1601395215
elapsed	mpi	240931597232.818604	10240	16	1601395461
elapsed	mpi	581178177118.301392	15360	16	1601396050
elapsed	mpi	348218202.590942	1024	16	1601396052
elapsed	mpi	1569044589.996338	2048	16	1601396054
elapsed	mpi	11896147489.547729	4096	16	1601396068
elapsed	mpi	105827672004.699707	8192	16	1601396177
elapsed	mpi	220059029817.581177	10240	16	1601396402
elapsed	mpi	593044742822.647095	15360	16	1601397005
elapsed	mpi	340117216.110229	1024	16	1601397008
elapsed	mpi	1573622226.715088	2048	16	1601397011
elapsed	mpi	11680500030.517578	4096	16	1601397024
elapsed	mpi	108045321941.375732	8192	16	1601397135
elapsed	mpi	228044970750.808716	10240	16	1601397368
elapsed	mpi	594913478612.899780	15360	16	1601397974
elapsed	mpi	365717649.459839	1024	16	1601397975
elapsed	mpi	1565734624.862671	2048	16	1601397978
elapsed	mpi	11348524808.883667	4096	16	1601397991
elapsed	mpi	111760979175.567627	8192	16	1601398106
elapsed	mpi	231578768014.907837	10240	16	1601398342
elapsed	mpi	605844999790.191650	15360	16	1601398956
elapsed	mpi	332111120.223999	1024	16	1601398957
elapsed	mpi	1776263475.418091	2048	16	1601398960
elapsed	mpi	11856691837.310791	4096	16	1601398974
elapsed	mpi	107596815347.671509	8192	16	1601399085
elapsed	mpi	229978737592.697144	10240	16	1601399320
elapsed	mpi	600191149234.771729	15360	16	1601399928
elapsed	mpi	278671264.648438	1024	16	1601399929
elapsed	mpi	1688095808.029175	2048	16	1601399932
elapsed	mpi	11222165107.727051	4096	16	1601399945
elapsed	mpi	109008207082.748413	8192	16	1601400057
elapsed	mpi	227637840509.414673	10240	16	1601400289
elapsed	mpi	597319042921.066284	15360	16	1601400895
elapsed	mpi	327906370.162964	1024	16	1601400897
elapsed	mpi	1538978099.822998	2048	16	1601400899
elapsed	mpi	10822193384.170532	4096	16	1601400911
elapsed	mpi	109198340177.536011	8192	16	1601401024
elapsed	mpi	222422565221.786499	10240	16	1601401251
elapsed	mpi	603099067926.406860	15360	16	1601401861
elapsed	mpi	371186733.245850	1024	16	1601401863
elapsed	mpi	1664795637.130737	2048	16	1601401866
elapsed	mpi	11683359622.955322	4096	16	1601401879
elapsed	mpi	107535981655.120850	8192	16	1601401990
elapsed	mpi	222437226533.889771	10240	16	1601402217
elapsed	mpi	594299813032.150269	15360	16	1601402820
elapsed	mpi	356265068.054199	1024	16	1601402824
elapsed	mpi	1761752367.019653	2048	16	1601402827
elapsed	mpi	10994857311.248779	4096	16	1601402840
elapsed	mpi	113647802591.323853	8192	16	1601402956
elapsed	mpi	222993338108.062744	10240	16	1601403184
elapsed	mpi	594827052116.394043	15360	16	1601403788
elapsed	mpi	332175493.240356	1024	16	1601403790
elapsed	mpi	1650516748.428345	2048	16	1601403793
elapsed	mpi	11189152240.753174	4096	16	1601403806
elapsed	mpi	107564036607.742310	8192	16	1601403916
elapsed	mpi	225254608869.552612	10240	16	1601404146
elapsed	mpi	591681415796.279907	15360	16	1601404746
elapsed	mpi	372133493.423462	1024	16	1601404747
elapsed	mpi	1877274751.663208	2048	16	1601404750
elapsed	mpi	11478949785.232544	4096	16	1601404764
elapsed	mpi	107637674808.502197	8192	16	1601404875
elapsed	mpi	228525172948.837280	10240	16	1601405107
elapsed	mpi	598689976215.362549	15360	16	1601405714
elapsed	mpi	260687828.063965	1024	16	1601405716
elapsed	mpi	1705862045.288086	2048	16	1601405718
elapsed	mpi	11249892473.220825	4096	16	1601405731
elapsed	mpi	107940964937.210083	8192	16	1601405842
elapsed	mpi	221691721439.361572	10240	16	1601406068
elapsed	mpi	592542440652.847290	15360	16	1601406669
elapsed	mpi	331367254.257202	1024	16	1601406675
elapsed	mpi	1725372314.453125	2048	16	1601406677
elapsed	mpi	11085279703.140259	4096	16	1601406690
elapsed	mpi	108725506544.113159	8192	16	1601406802
elapsed	mpi	223191362857.818604	10240	16	1601407029
elapsed	mpi	593509286165.237427	15360	16	1601407630
elapsed	mpi	335732698.440552	1024	16	1601407635
elapsed	mpi	1737076520.919800	2048	16	1601407638
elapsed	mpi	11609745025.634766	4096	16	1601407651
elapsed	mpi	114259631156.921387	8192	16	1601407769
elapsed	mpi	220663967370.986938	10240	16	1601407994
elapsed	mpi	595283427715.301514	15360	16	1601408599
elapsed	mpi	389003753.662109	1024	16	1601408601
elapsed	mpi	1594973802.566528	2048	16	1601408604
elapsed	mpi	10670287370.681763	4096	16	1601408616
elapsed	mpi	107222204446.792603	8192	16	1601408727
elapsed	mpi	223268359422.683716	10240	16	1601408955
elapsed	mpi	663591265439.987183	15360	16	1601409628
elapsed	mpi	388261795.043945	1024	16	1601409629
elapsed	mpi	1631042957.305908	2048	16	1601409632
elapsed	mpi	11095473527.908325	4096	16	1601409645
elapsed	mpi	107744927167.892456	8192	16	1601409756
elapsed	mpi	221269154787.063599	10240	16	1601409981
elapsed	mpi	597414378881.454468	15360	16	1601410586
elapsed	mpi	297263383.865356	1024	16	1601410588
elapsed	mpi	1604992628.097534	2048	16	1601410591
elapsed	mpi	11059148788.452148	4096	16	1601410603
elapsed	mpi	107516443967.819214	8192	16	1601410714
elapsed	mpi	220030118942.260742	10240	16	1601410938
elapsed	mpi	600189647912.979126	15360	16	1601411547
elapsed	mpi	350608587.265015	1024	16	1601411548
elapsed	mpi	1454701900.482178	2048	16	1601411551
elapsed	mpi	11527841567.993164	4096	16	1601411564
elapsed	mpi	118114860773.086548	8192	16	1601411686
elapsed	mpi	223869820117.950439	10240	16	1601411914
elapsed	mpi	652107873678.207397	15360	16	1601412574
elapsed	mpi	430058240.890503	1024	16	1601412599
elapsed	mpi	1767355680.465698	2048	16	1601412602
elapsed	mpi	11911242961.883545	4096	16	1601412615
elapsed	mpi	116009124994.277954	8192	16	1601412735
elapsed	mpi	237510281085.968018	10240	16	1601412976
elapsed	mpi	657587201595.306396	15360	16	1601413645
elapsed	mpi	380231618.881226	1024	16	1601413671
elapsed	mpi	1663479566.574097	2048	16	1601413674
elapsed	mpi	11303811311.721802	4096	16	1601413688
elapsed	mpi	113350615262.985229	8192	16	1601413805
elapsed	mpi	237658877611.160278	10240	16	1601414048
elapsed	mpi	627140514850.616455	15360	16	1601414684
elapsed	mpi	381693840.026855	1024	16	1601414706
elapsed	mpi	1985838890.075684	2048	16	1601414709
elapsed	mpi	11224483013.153076	4096	16	1601414722
elapsed	mpi	117482147693.634033	8192	16	1601414843
elapsed	mpi	221072609186.172485	10240	16	1601415068
elapsed	mpi	592924656629.562378	15360	16	1601415670
elapsed	mpi	306505680.084229	1024	16	1601415673
elapsed	mpi	1778801679.611206	2048	16	1601415676
elapsed	mpi	10663156270.980835	4096	16	1601415688
elapsed	mpi	111140360832.214355	8192	16	1601415802
elapsed	mpi	239233720779.418945	10240	16	1601416046
elapsed	mpi	651069392442.703247	15360	16	1601416706
elapsed	MLlib (op)	8043068484	1024	16	1601304670
elapsed	MLlib (op)	9617160051	2048	16	1601304686
elapsed	MLlib (op)	23725547037	4096	16	1601304717
elapsed	MLlib (op)	104131050459	8192	16	1601304828
elapsed	MLlib (op)	183399607425	10240	16	1601305019
elapsed	MLlib (op)	573712549839	15360	16	1601305599
elapsed	MLlib (op)	6959544260	1024	16	1601305613
elapsed	MLlib (op)	9162499775	2048	16	1601305630
elapsed	MLlib (op)	23398537131	4096	16	1601305660
elapsed	MLlib (op)	104796423566	8192	16	1601305771
elapsed	MLlib (op)	193337569761	10240	16	1601305972
elapsed	MLlib (op)	570513325076	15360	16	1601306549
elapsed	MLlib (op)	6732596092	1024	16	1601306563
elapsed	MLlib (op)	8509153868	2048	16	1601306578
elapsed	MLlib (op)	24822239939	4096	16	1601306610
elapsed	MLlib (op)	104913469298	8192	16	1601306722
elapsed	MLlib (op)	191048701021	10240	16	1601306920
elapsed	MLlib (op)	569405004491	15360	16	1601307496
elapsed	MLlib (op)	6798050366	1024	16	1601307510
elapsed	MLlib (op)	9523509172	2048	16	1601307526
elapsed	MLlib (op)	23497872696	4096	16	1601307557
elapsed	MLlib (op)	104158212190	8192	16	1601307668
elapsed	MLlib (op)	190825706812	10240	16	1601307866
elapsed	MLlib (op)	570753931950	15360	16	1601308443
elapsed	MLlib (op)	6987241542	1024	16	1601308457
elapsed	MLlib (op)	9461563248	2048	16	1601308474
elapsed	MLlib (op)	24981806569	4096	16	1601308505
elapsed	MLlib (op)	104096336547	8192	16	1601308616
elapsed	MLlib (op)	190730439814	10240	16	1601308813
elapsed	MLlib (op)	574666443579	15360	16	1601309395
elapsed	MLlib (op)	7516502470	1024	16	1601309409
elapsed	MLlib (op)	9549039293	2048	16	1601309426
elapsed	MLlib (op)	24933872493	4096	16	1601309457
elapsed	MLlib (op)	104297817438	8192	16	1601309569
elapsed	MLlib (op)	189327297032	10240	16	1601309765
elapsed	MLlib (op)	562526310931	15360	16	1601310334
elapsed	MLlib (op)	6979456717	1024	16	1601310348
elapsed	MLlib (op)	9026541221	2048	16	1601310364
elapsed	MLlib (op)	23439321338	4096	16	1601310394
elapsed	MLlib (op)	106365524680	8192	16	1601310507
elapsed	MLlib (op)	192146743756	10240	16	1601310706
elapsed	MLlib (op)	566401396369	15360	16	1601311280
elapsed	MLlib (op)	6771306833	1024	16	1601311293
elapsed	MLlib (op)	10079060056	2048	16	1601311310
elapsed	MLlib (op)	23549984484	4096	16	1601311341
elapsed	MLlib (op)	104564455579	8192	16	1601311452
elapsed	MLlib (op)	191134437994	10240	16	1601311650
elapsed	MLlib (op)	565262690644	15360	16	1601312222
elapsed	MLlib (op)	7231035252	1024	16	1601312237
elapsed	MLlib (op)	9610924234	2048	16	1601312253
elapsed	MLlib (op)	23983910078	4096	16	1601312284
elapsed	MLlib (op)	104513200346	8192	16	1601312396
elapsed	mpi	390927520751.953125	15360	16	1601312424
elapsed	mpi	130140781.402588	1024	16	1601312425
elapsed	mpi	906717538.833618	2048	16	1601312427
elapsed	mpi	7000322818.756104	4096	16	1601312434
elapsed	MLlib (op)	190366562041	10240	16	1601312593
elapsed	MLlib (op)	565610701992	15360	16	1601313165
elapsed	MLlib (op)	6786379567	1024	16	1601313179
elapsed	MLlib (op)	9972876673	2048	16	1601313196
elapsed	MLlib (op)	23864338383	4096	16	1601313226
elapsed	MLlib (op)	105930117952	8192	16	1601313339
elapsed	MLlib (op)	191580684086	10240	16	1601313538
elapsed	MLlib (op)	560339844448	15360	16	1601314105
elapsed	MLlib (op)	7014463720	1024	16	1601314119
elapsed	MLlib (op)	8358419792	2048	16	1601314134
elapsed	MLlib (op)	24697616184	4096	16	1601314165
elapsed	MLlib (op)	105900995722	8192	16	1601314278
elapsed	MLlib (op)	186331397851	10240	16	1601314471
elapsed	MLlib (op)	563451318514	15360	16	1601315042
elapsed	MLlib (op)	6918276876	1024	16	1601315055
elapsed	MLlib (op)	9509838998	2048	16	1601315072
elapsed	MLlib (op)	24665146632	4096	16	1601315103
elapsed	MLlib (op)	103436745333	8192	16	1601315213
elapsed	MLlib (op)	191354966938	10240	16	1601315412
elapsed	MLlib (op)	565924499146	15360	16	1601315985
elapsed	MLlib (op)	7379510395	1024	16	1601315999
elapsed	MLlib (op)	9696497565	2048	16	1601316016
elapsed	MLlib (op)	24711001977	4096	16	1601316047
elapsed	MLlib (op)	104522617845	8192	16	1601316159
elapsed	MLlib (op)	190730978970	10240	16	1601316356
elapsed	MLlib (op)	562971845678	15360	16	1601316926
elapsed	MLlib (op)	7045610339	1024	16	1601316940
elapsed	MLlib (op)	9641734364	2048	16	1601316957
elapsed	MLlib (op)	23703045209	4096	16	1601316988
elapsed	MLlib (op)	105733253702	8192	16	1601317100
elapsed	MLlib (op)	190084903180	10240	16	1601317297
elapsed	MLlib (op)	560630992763	15360	16	1601317865
elapsed	MLlib (op)	7098441725	1024	16	1601317879
elapsed	MLlib (op)	9284801455	2048	16	1601317895
elapsed	MLlib (op)	23634750792	4096	16	1601317925
elapsed	MLlib (op)	105192465116	8192	16	1601318038
elapsed	MLlib (op)	187639183532	10240	16	1601318232
elapsed	MLlib (op)	564450887112	15360	16	1601318803
elapsed	MLlib (op)	7389570515	1024	16	1601318818
elapsed	MLlib (op)	9138347822	2048	16	1601318834
elapsed	MLlib (op)	23191678349	4096	16	1601318864
elapsed	MLlib (op)	104195368947	8192	16	1601318974
elapsed	MLlib (op)	184926092797	10240	16	1601319166
elapsed	MLlib (op)	573270716803	15360	16	1601319746
elapsed	MLlib (op)	6908655454	1024	16	1601319760
elapsed	MLlib (op)	9943792122	2048	16	1601319777
elapsed	MLlib (op)	22972287356	4096	16	1601319806
elapsed	MLlib (op)	104662152931	8192	16	1601319918
elapsed	MLlib (op)	190443691401	10240	16	1601320115
elapsed	MLlib (op)	561780419959	15360	16	1601320683
elapsed	MLlib (op)	7093987563	1024	16	1601320697
elapsed	MLlib (op)	9290825063	2048	16	1601320714
elapsed	MLlib (op)	23227942357	4096	16	1601320744
elapsed	MLlib (op)	103809627466	8192	16	1601320854
elapsed	MLlib (op)	186532605893	10240	16	1601321048
elapsed	MLlib (op)	571040351117	15360	16	1601321626
elapsed	MLlib (op)	7133814511	1024	16	1601321639
elapsed	MLlib (op)	8547125104	2048	16	1601321655
elapsed	MLlib (op)	24490970506	4096	16	1601321686
elapsed	MLlib (op)	105536896778	8192	16	1601321798
elapsed	MLlib (op)	189968187091	10240	16	1601321995
elapsed	MLlib (op)	570309332726	15360	16	1601322572
elapsed	MLlib (op)	7072145046	1024	16	1601322586
elapsed	MLlib (op)	8944096730	2048	16	1601322601
elapsed	MLlib (op)	23691237517	4096	16	1601322632
elapsed	MLlib (op)	106038792674	8192	16	1601322745
elapsed	MLlib (op)	191384583864	10240	16	1601322943
elapsed	MLlib (op)	568823621352	15360	16	1601323518
elapsed	MLlib (op)	7693380483	1024	16	1601323533
elapsed	MLlib (op)	10164818744	2048	16	1601323550
elapsed	MLlib (op)	22843918966	4096	16	1601323579
elapsed	MLlib (op)	103719659881	8192	16	1601323690
elapsed	MLlib (op)	189616885029	10240	16	1601323886
elapsed	MLlib (op)	568008370128	15360	16	1601324461
elapsed	MLlib (op)	6790011703	1024	16	1601324475
elapsed	MLlib (op)	9607017781	2048	16	1601324491
elapsed	MLlib (op)	24192803257	4096	16	1601324522
elapsed	MLlib (op)	104778742059	8192	16	1601324634
elapsed	MLlib (op)	191903872129	10240	16	1601324832
elapsed	MLlib (op)	563324067928	15360	16	1601325402
elapsed	MLlib (op)	6985082557	1024	16	1601325416
elapsed	MLlib (op)	9916246770	2048	16	1601325433
elapsed	MLlib (op)	24176792450	4096	16	1601325464
elapsed	MLlib (op)	104208441467	8192	16	1601325575
elapsed	MLlib (op)	194387116944	10240	16	1601325777
elapsed	MLlib (op)	560188681846	15360	16	1601326344
elapsed	MLlib (op)	7188924994	1024	16	1601326358
elapsed	MLlib (op)	9353361973	2048	16	1601326374
elapsed	MLlib (op)	23194982992	4096	16	1601326404
elapsed	MLlib (op)	103871981519	8192	16	1601326514
elapsed	MLlib (op)	183796863789	10240	16	1601326705
elapsed	MLlib (op)	562813641390	15360	16	1601327275
elapsed	MLlib (op)	7720059458	1024	16	1601327289
elapsed	MLlib (op)	9123621298	2048	16	1601327305
elapsed	MLlib (op)	24913834835	4096	16	1601327337
elapsed	MLlib (op)	104169143608	8192	16	1601327448
elapsed	MLlib (op)	186567107800	10240	16	1601327641
elapsed	MLlib (op)	571803772599	15360	16	1601328220
elapsed	MLlib (op)	7291824187	1024	16	1601328234
elapsed	MLlib (op)	9819676715	2048	16	1601328250
elapsed	MLlib (op)	24506245000	4096	16	1601328282
elapsed	MLlib (op)	104688363755	8192	16	1601328393
elapsed	MLlib (op)	183343630021	10240	16	1601328583
elapsed	MLlib (op)	559962786529	15360	16	1601329150
elapsed	MLlib (op)	6861910051	1024	16	1601329164
elapsed	MLlib (op)	10086619631	2048	16	1601329181
elapsed	MLlib (op)	22308457689	4096	16	1601329210
elapsed	MLlib (op)	104768049378	8192	16	1601329322
elapsed	MLlib (op)	188900384510	10240	16	1601329518
elapsed	MLlib (op)	569161234794	15360	16	1601330094
elapsed	MLlib (op)	6977972039	1024	16	1601330107
elapsed	MLlib (op)	9930368324	2048	16	1601330124
elapsed	MLlib (op)	24406924881	4096	16	1601330155
elapsed	MLlib (op)	105459502827	8192	16	1601330268
elapsed	MLlib (op)	190673199357	10240	16	1601330465
elapsed	MLlib (op)	561410430862	15360	16	1601331033
elapsed	MLlib (op)	6989645889	1024	16	1601331047
elapsed	MLlib (op)	8687872538	2048	16	1601331062
elapsed	MLlib (op)	24156713263	4096	16	1601331093
elapsed	MLlib (op)	102697383140	8192	16	1601331203
elapsed	MLlib (op)	194398012074	10240	16	1601331404
elapsed	MLlib (op)	565532536836	15360	16	1601331977
elapsed	MLlib (op)	7309148397	1024	16	1601331991
elapsed	MLlib (op)	8727516759	2048	16	1601332006
elapsed	MLlib (op)	23644313767	4096	16	1601332037
elapsed	MLlib (op)	104298264849	8192	16	1601332148
elapsed	MLlib (op)	192028291918	10240	16	1601332347
elapsed	MLlib (op)	567473514301	15360	16	1601332921
elapsed	MLlib (op)	7005988190	1024	16	1601332935
elapsed	MLlib (op)	9273748838	2048	16	1601332951
elapsed	MLlib (op)	23181918334	4096	16	1601332981
elapsed	MLlib (op)	103877197877	8192	16	1601333092
elapsed	MLlib (op)	189399001693	10240	16	1601333288
elapsed	MLlib (op)	563866122953	15360	16	1601333859
elapsed	MLlib (op)	7165124730	1024	16	1601333873
elapsed	MLlib (op)	9437159067	2048	16	1601333889
elapsed	MLlib (op)	23530432603	4096	16	1601333919
elapsed	MLlib (op)	103920091323	8192	16	1601334030
elapsed	MLlib (op)	185932579671	10240	16	1601334223
elapsed	MLlib (op)	572165993833	15360	16	1601334802
elapsed	MLlib (op)	6960005847	1024	16	1601334816
elapsed	MLlib (op)	8636656617	2048	16	1601334831
elapsed	MLlib (op)	23670946928	4096	16	1601334862
elapsed	MLlib (op)	104802402303	8192	16	1601334973
elapsed	MLlib (op)	193543358401	10240	16	1601335174
elapsed	MLlib (op)	573047012170	15360	16	1601335754
elapsed	MLlib (op)	7050124317	1024	16	1601335767
elapsed	MLlib (op)	10061116726	2048	16	1601335784
elapsed	MLlib (op)	24408747031	4096	16	1601335815
elapsed	MLlib (op)	105072961130	8192	16	1601335927
elapsed	MLlib (op)	191754320187	10240	16	1601336126
elapsed	MLlib (op)	564442757348	15360	16	1601336697
elapsed	MLlib (op)	7115094599	1024	16	1601336711
elapsed	MLlib (op)	9367489150	2048	16	1601336727
elapsed	MLlib (op)	25118917008	4096	16	1601336759
elapsed	MLlib (op)	104089681843	8192	16	1601336870
elapsed	MLlib (op)	188078999235	10240	16	1601337065
elapsed	MLlib (op)	567583173791	15360	16	1601337639
elapsed	MLlib (op)	7128830606	1024	16	1601337653
elapsed	MLlib (op)	8796296315	2048	16	1601337669
elapsed	MLlib (op)	24214054832	4096	16	1601337700
elapsed	MLlib (op)	104195224563	8192	16	1601337811
elapsed	MLlib (op)	192173786243	10240	16	1601338010
elapsed	MLlib (op)	568279281711	15360	16	1601338585
elapsed	MLlib (op)	7204845262	1024	16	1601338600
elapsed	MLlib (op)	9091582316	2048	16	1601338615
elapsed	MLlib (op)	23492766898	4096	16	1601338646
elapsed	MLlib (op)	105106048941	8192	16	1601338758
elapsed	MLlib (op)	190014873701	10240	16	1601338955
elapsed	MLlib (op)	563760153182	15360	16	1601339525
elapsed	MLlib (op)	6926614424	1024	16	1601339539
elapsed	MLlib (op)	9444975566	2048	16	1601339555
elapsed	MLlib (op)	23001828235	4096	16	1601339585
elapsed	MLlib (op)	104256619250	8192	16	1601339696
elapsed	MLlib (op)	189566449152	10240	16	1601339893
elapsed	MLlib (op)	569927785407	15360	16	1601340469
elapsed	MLlib (op)	7416633590	1024	16	1601340484
elapsed	MLlib (op)	9855074712	2048	16	1601340500
elapsed	MLlib (op)	23530550858	4096	16	1601340531
elapsed	MLlib (op)	106729563399	8192	16	1601340644
elapsed	MLlib (op)	187059967831	10240	16	1601340838
elapsed	MLlib (op)	562782902896	15360	16	1601341407
elapsed	MLlib (op)	7333772028	1024	16	1601341422
elapsed	MLlib (op)	9467921196	2048	16	1601341438
elapsed	MLlib (op)	24479905819	4096	16	1601341469
elapsed	MLlib (op)	104328167365	8192	16	1601341580
elapsed	MLlib (op)	189246071633	10240	16	1601341776
elapsed	MLlib (op)	562223511725	15360	16	1601342345
elapsed	MLlib (op)	7414436353	1024	16	1601342360
elapsed	MLlib (op)	9098795938	2048	16	1601342376
elapsed	MLlib (op)	23263225957	4096	16	1601342406
elapsed	MLlib (op)	104268228359	8192	16	1601342517
elapsed	MLlib (op)	183258300811	10240	16	1601342707
elapsed	MLlib (op)	567055695230	15360	16	1601343281
elapsed	MLlib (op)	7294543803	1024	16	1601343295
elapsed	MLlib (op)	9503764631	2048	16	1601343312
elapsed	MLlib (op)	23306983146	4096	16	1601343342
elapsed	MLlib (op)	103546517823	8192	16	1601343452
elapsed	MLlib (op)	186859117456	10240	16	1601343646
elapsed	MLlib (op)	567752907660	15360	16	1601344221
elapsed	MLlib (op)	7072593812	1024	16	1601344235
elapsed	MLlib (op)	9427699776	2048	16	1601344251
elapsed	MLlib (op)	23286316891	4096	16	1601344281
elapsed	MLlib (op)	103321155942	8192	16	1601344391
elapsed	MLlib (op)	185450817322	10240	16	1601344584
elapsed	MLlib (op)	561564704372	15360	16	1601345152
elapsed	MLlib (op)	7091658280	1024	16	1601345166
elapsed	MLlib (op)	9673256369	2048	16	1601345182
elapsed	MLlib (op)	23259837327	4096	16	1601345213
elapsed	MLlib (op)	103967157062	8192	16	1601345323
elapsed	MLlib (op)	192146821622	10240	16	1601345522
elapsed	MLlib (op)	570147807013	15360	16	1601346099
elapsed	MLlib (op)	6869813659	1024	16	1601346113
elapsed	MLlib (op)	9639323538	2048	16	1601346129
elapsed	MLlib (op)	23290147871	4096	16	1601346159
elapsed	MLlib (op)	104827641869	8192	16	1601346271
elapsed	MLlib (op)	189838575147	10240	16	1601346468
elapsed	MLlib (op)	555651072306	15360	16	1601347030
elapsed	MLlib (op)	6873046517	1024	16	1601347044
elapsed	MLlib (op)	9475164500	2048	16	1601347060
elapsed	MLlib (op)	22538431303	4096	16	1601347089
elapsed	MLlib (op)	104060421559	8192	16	1601347200
elapsed	MLlib (op)	189065062480	10240	16	1601347396
elapsed	MLlib (op)	564109013329	15360	16	1601347967
elapsed	MLlib (op)	6968240144	1024	16	1601347981
elapsed	MLlib (op)	9348267603	2048	16	1601347997
elapsed	MLlib (op)	24890823632	4096	16	1601348028
elapsed	MLlib (op)	103734583096	8192	16	1601348139
elapsed	MLlib (op)	189847495310	10240	16	1601348336
elapsed	MLlib (op)	563285690372	15360	16	1601348906
elapsed	MLlib (op)	7420524436	1024	16	1601348920
elapsed	MLlib (op)	8786977497	2048	16	1601348936
elapsed	MLlib (op)	24086401345	4096	16	1601348967
elapsed	MLlib (op)	103732331635	8192	16	1601349077
elapsed	MLlib (op)	187185300881	10240	16	1601349271
elapsed	MLlib (op)	564311146556	15360	16	1601349842
elapsed	MLlib (op)	7662946883	1024	16	1601349857
elapsed	MLlib (op)	9453856378	2048	16	1601349873
elapsed	MLlib (op)	23035206772	4096	16	1601349903
elapsed	MLlib (op)	105535641434	8192	16	1601350016
elapsed	MLlib (op)	187441642468	10240	16	1601350210
elapsed	MLlib (op)	564924527145	15360	16	1601350782
elapsed	MLlib (op)	6926833756	1024	16	1601350796
elapsed	MLlib (op)	8549524706	2048	16	1601350811
elapsed	MLlib (op)	25106467649	4096	16	1601350843
elapsed	MLlib (op)	106146394132	8192	16	1601350956
elapsed	MLlib (op)	184610733132	10240	16	1601351147
elapsed	MLlib (op)	559442571078	15360	16	1601351714
elapsed	MLlib (op)	6898346428	1024	16	1601351727
elapsed	MLlib (op)	9436889585	2048	16	1601351744
elapsed	MLlib (op)	23176122075	4096	16	1601351773
elapsed	MLlib (op)	104906574413	8192	16	1601351885
elapsed	MLlib (op)	190646751963	10240	16	1601352083
elapsed	MLlib (op)	566532240028	15360	16	1601352656
elapsed	MLlib (op)	7018365559	1024	16	1601352670
elapsed	MLlib (op)	9418304664	2048	16	1601352686
elapsed	MLlib (op)	24445195469	4096	16	1601352717
elapsed	MLlib (op)	104947630028	8192	16	1601352829
elapsed	MLlib (op)	184331235841	10240	16	1601353020
elapsed	MLlib (op)	567524790960	15360	16	1601353595
elapsed	MLlib (op)	6920751863	1024	16	1601353608
elapsed	MLlib (op)	9645601531	2048	16	1601353625
elapsed	MLlib (op)	24086301794	4096	16	1601353656
elapsed	MLlib (op)	104140989572	8192	16	1601353767
elapsed	MLlib (op)	191553288037	10240	16	1601353965
elapsed	MLlib (op)	560211116897	15360	16	1601354533
elapsed	MLlib (op)	7587766290	1024	16	1601354547
elapsed	MLlib (op)	10050398037	2048	16	1601354564
elapsed	MLlib (op)	24061016443	4096	16	1601354594
elapsed	MLlib (op)	104115450937	8192	16	1601354705
elapsed	MLlib (op)	187010263797	10240	16	1601354899
elapsed	MLlib (op)	555109792541	15360	16	1601355461
elapsed	MLlib (op)	7359621637	1024	16	1601355475
elapsed	MLlib (op)	9971444152	2048	16	1601355492
elapsed	MLlib (op)	25272213912	4096	16	1601355524
elapsed	MLlib (op)	104531711330	8192	16	1601355636
elapsed	MLlib (op)	192373427060	10240	16	1601355835
elapsed	MLlib (op)	568433634480	15360	16	1601356410
elapsed	MLlib (op)	7065090048	1024	16	1601356424
elapsed	MLlib (op)	9102974880	2048	16	1601356440
elapsed	MLlib (op)	23050751085	4096	16	1601356470
elapsed	MLlib (op)	105641701098	8192	16	1601356582
elapsed	MLlib (op)	190761590104	10240	16	1601356779
elapsed	MLlib (op)	573342121200	15360	16	1601357359
elapsed	MLlib (op)	7009999144	1024	16	1601357373
elapsed	MLlib (op)	9245707988	2048	16	1601357389
elapsed	MLlib (op)	23446903864	4096	16	1601357419
elapsed	MLlib (op)	105219180389	8192	16	1601357532
elapsed	MLlib (op)	190459933132	10240	16	1601357729
elapsed	MLlib (op)	569418079073	15360	16	1601358305
elapsed	MLlib (op)	7077420664	1024	16	1601358319
elapsed	MLlib (op)	9522495726	2048	16	1601358335
elapsed	MLlib (op)	23248162642	4096	16	1601358365
elapsed	MLlib (op)	103176169377	8192	16	1601358475
elapsed	MLlib (op)	190794499682	10240	16	1601358673
elapsed	MLlib (op)	567128341226	15360	16	1601359247
elapsed	MLlib (op)	7189803796	1024	16	1601359261
elapsed	MLlib (op)	8305219387	2048	16	1601359276
elapsed	MLlib (op)	24684831838	4096	16	1601359307
elapsed	MLlib (op)	104723053718	8192	16	1601359419
elapsed	MLlib (op)	193417027927	10240	16	1601359619
elapsed	MLlib (op)	567123272451	15360	16	1601360193
elapsed	MLlib (op)	6930043214	1024	16	1601360207
elapsed	MLlib (op)	8834828768	2048	16	1601360222
elapsed	MLlib (op)	23741207107	4096	16	1601360253
elapsed	MLlib (op)	104020446071	8192	16	1601360364
elapsed	MLlib (op)	192184805212	10240	16	1601360563
elapsed	MLlib (op)	570507032128	15360	16	1601361140
elapsed	MLlib (op)	6620054260	1024	16	1601361154
elapsed	MLlib (op)	10114847085	2048	16	1601361171
elapsed	MLlib (op)	23685203409	4096	16	1601361201
elapsed	MLlib (op)	103604923391	8192	16	1601361312
elapsed	MLlib (op)	191817087902	10240	16	1601361510
elapsed	MLlib (op)	567294236223	15360	16	1601362085
elapsed	MLlib (op)	6948126814	1024	16	1601362098
elapsed	MLlib (op)	9544941266	2048	16	1601362115
elapsed	MLlib (op)	23526911049	4096	16	1601362145
elapsed	MLlib (op)	104317693265	8192	16	1601362256
elapsed	MLlib (op)	189648908466	10240	16	1601362453
elapsed	MLlib (op)	558443823399	15360	16	1601363018
elapsed	MLlib (op)	7400019652	1024	16	1601363032
elapsed	MLlib (op)	9613142959	2048	16	1601363049
elapsed	MLlib (op)	23416037019	4096	16	1601363079
elapsed	MLlib (op)	104744319961	8192	16	1601363190
elapsed	MLlib (op)	190734386598	10240	16	1601363388
elapsed	MLlib (op)	563218983489	15360	16	1601363958
elapsed	MLlib (op)	7221369979	1024	16	1601363972
elapsed	MLlib (op)	9275262879	2048	16	1601363988
elapsed	MLlib (op)	23586140719	4096	16	1601364018
elapsed	MLlib (op)	104497483777	8192	16	1601364130
elapsed	MLlib (op)	190559613794	10240	16	1601364327
elapsed	MLlib (op)	558698889741	15360	16	1601364892
elapsed	MLlib (op)	7291797681	1024	16	1601364906
elapsed	MLlib (op)	9375597240	2048	16	1601364922
elapsed	MLlib (op)	23212450511	4096	16	1601364952
elapsed	MLlib (op)	104051971664	8192	16	1601365063
elapsed	MLlib (op)	190574751744	10240	16	1601365261
elapsed	MLlib (op)	571288704483	15360	16	1601365839
elapsed	MLlib (op)	6991849861	1024	16	1601365853
elapsed	MLlib (op)	9672184811	2048	16	1601365869
elapsed	MLlib (op)	22965550009	4096	16	1601365899
elapsed	MLlib (op)	104694490586	8192	16	1601366010
elapsed	MLlib (op)	186736739575	10240	16	1601366204
elapsed	MLlib (op)	567708360463	15360	16	1601366778
elapsed	MLlib (op)	7596801452	1024	16	1601366793
elapsed	MLlib (op)	9501941730	2048	16	1601366809
elapsed	MLlib (op)	23269837919	4096	16	1601366839
elapsed	MLlib (op)	103627256845	8192	16	1601366949
elapsed	MLlib (op)	189904533006	10240	16	1601367146
elapsed	MLlib (op)	565100476141	15360	16	1601367718
elapsed	MLlib (op)	6876150082	1024	16	1601367732
elapsed	MLlib (op)	9706001788	2048	16	1601367749
elapsed	MLlib (op)	23432375841	4096	16	1601367779
elapsed	MLlib (op)	103371465341	8192	16	1601367889
elapsed	MLlib (op)	191301513733	10240	16	1601368087
elapsed	MLlib (op)	563111857077	15360	16	1601368657
elapsed	MLlib (op)	6904272265	1024	16	1601368670
elapsed	MLlib (op)	8564365494	2048	16	1601368686
elapsed	MLlib (op)	23481497588	4096	16	1601368716
elapsed	MLlib (op)	103650120437	8192	16	1601368827
elapsed	MLlib (op)	191743709493	10240	16	1601369025
elapsed	MLlib (op)	570596576371	15360	16	1601369603
elapsed	MLlib (op)	7182539383	1024	16	1601369617
elapsed	MLlib (op)	9594076113	2048	16	1601369633
elapsed	MLlib (op)	23390211918	4096	16	1601369663
elapsed	MLlib (op)	104754283019	8192	16	1601369775
elapsed	MLlib (op)	191252571204	10240	16	1601369973
elapsed	MLlib (op)	568662357510	15360	16	1601370548
elapsed	MLlib (op)	7364192403	1024	16	1601370562
elapsed	MLlib (op)	9743165197	2048	16	1601370579
elapsed	MLlib (op)	23317736836	4096	16	1601370609
elapsed	MLlib (op)	103731607780	8192	16	1601370719
elapsed	MLlib (op)	192255759023	10240	16	1601370918
elapsed	MLlib (op)	567557708798	15360	16	1601371493
elapsed	MLlib (op)	7026438120	1024	16	1601371506
elapsed	MLlib (op)	9832292233	2048	16	1601371523
elapsed	MLlib (op)	22731631189	4096	16	1601371552
elapsed	MLlib (op)	103026187637	8192	16	1601371662
elapsed	MLlib (op)	189638661649	10240	16	1601371858
elapsed	MLlib (op)	572996353908	15360	16	1601372438
elapsed	MLlib (op)	7604614775	1024	16	1601372453
elapsed	MLlib (op)	9657280416	2048	16	1601372469
elapsed	MLlib (op)	23813823993	4096	16	1601372499
elapsed	MLlib (op)	103486214387	8192	16	1601372610
elapsed	MLlib (op)	184899212001	10240	16	1601372801
elapsed	MLlib (op)	564862448901	15360	16	1601373373
elapsed	MLlib (op)	6924954328	1024	16	1601373386
elapsed	MLlib (op)	9433070032	2048	16	1601373402
elapsed	MLlib (op)	22925158388	4096	16	1601373432
elapsed	MLlib (op)	102040730175	8192	16	1601373541
elapsed	MLlib (op)	188727003436	10240	16	1601373736
elapsed	MLlib (op)	570822673239	15360	16	1601374314
elapsed	MLlib (op)	7255608884	1024	16	1601374328
elapsed	MLlib (op)	9041878132	2048	16	1601374343
elapsed	MLlib (op)	23674038295	4096	16	1601374374
elapsed	MLlib (op)	102923746988	8192	16	1601374483
elapsed	MLlib (op)	192651685002	10240	16	1601374682
[truncated: 2,780 more rows]
